1

2

3

**Gene function contributes to gene expression levels in *S. cerevisiae***

4

5 Mark J. Hickman, Andrea Jackson, Abigail Smith, Julianne Thornton, and Amanda Tursi

6

7

8 Department of Molecular and Cellular Biosciences, Rowan University, Glassboro, NJ

9

08028

10 Running Title: Constraints to gene expression levels

11

12 Corresponding author:

13 Mark J. Hickman, Ph.D.

14 Department of Molecular and Cellular Biology

15 Rowan University

16 201 Mullica Hill Road

17 Glassboro, NJ 08028

18 (856) 256-4894

19 [mhickman@post.harvard.edu](mailto:mhickman@post.harvard.edu).

20

21 Key words: RNA-seq, gene expression, mRNA, gene ontology, yeast

22  
23  
24  
25  
26  
27  
28  
29  
30  
31  
32  
33  
34  
35  
36  
37  
38  
39  
40  
41

## ABSTRACT

It is not understood what evolutionary factors drive some genes to be expressed at a higher level than others. Here, we hypothesized that a gene's function plays an important role in setting expression level. First, we established that each *S. cerevisiae* gene is maintained at a specific expression level by analyzing RNA-seq data from multiple studies. Next, we found that mRNA and protein levels were maintained for the orthologous genes in *S. pombe*, showing that gene function, conserved in orthologs, is important in setting expression level. To further explore the role of gene function in setting expression level, we analyzed mRNA and protein levels of *S. cerevisiae* genes within gene ontology (GO) categories. The GO framework systematically defines gene function based on experimental evidence. We found that several GO categories contain genes with statistically significant expression extremes; for example, genes involved in translation or energy production are highly expressed while genes involved in chromosomal activities, such as replication and transcription, are weakly expressed. Finally, we were able to predict expression levels using GO information alone. We created and optimized a linear equation that predicted a gene's expression based on the gene's membership in 161 GO categories. The greater number of GO categories with which a gene is associated, the more accurately expression could be predicted. Taken together, our analysis systematically demonstrates that gene function is an important determinant of expression level.

42

## INTRODUCTION

43

Proteins play critical roles in cellular metabolism, structure and homeostasis.

44

Each step of gene expression is intricately regulated to ensure that the abundance of

45

each protein is appropriate for the cellular condition (Wittkopp 2014). With recent

46

advances in protein quantitation, it has been possible to ascertain “absolute” protein

47

abundances (Vogel and Marcotte 2012; Liu *et al.* 2016).. These technologies have

48

revealed that the steady-state abundance of each protein remains similar across studies

49

(Conesa *et al.* 2016), suggesting that there is a set point for each protein. The steady-

50

state abundance of each protein is highly correlated with that of orthologous proteins

51

across diverse taxa (Schrimpf *et al.* 2009; Laurent *et al.* 2010; Khan *et al.* 2013). Since

52

orthologs are known to share function (Dolinski and Botstein 2007), the fact that protein

53

abundance is widely conserved suggests that the function of each protein is important in

54

determining its abundance.

55

56

It is expected that, through evolutionary forces, protein abundance reaches a

57

level that maximizes the fitness of the organism. Two opposing factors influence the

58

expressed level of a protein: the cost of protein synthesis drives down expression while

59

the biochemical need for the protein drives up expression, ultimately resulting in a level

60

that maximizes fitness (Wagner 2005; Dekel and Alon 2005; Lang *et al.* 2009). We

61

hypothesize that this biochemical need can be predicted by the protein’s function, as

62

captured in the gene ontology (GO) framework. Taking this one step further, we

63

propose that the GO terms describing a gene product can be used to predict protein

64

abundance. Thus, genes that share a GO term will exhibit similar protein abundances

65 because the proteins work with related biochemical parameters. Gene ontology (GO)  
66 attempts to define three aspects of a gene's function (molecular function, biological  
67 process, and cellular component) and these aspects can be used to think about how  
68 function may influence expression level. For example, proteins with the same molecular  
69 function (e.g. isomerase activity) may have comparable Michaelis-Menten kinetics (e.g.,  
70  $K_m$ ,  $k_{cat}$ ) and work on substrates with related concentrations. Proteins that participate in  
71 the same biological process (e.g., cytoplasmic translation) are components of a  
72 pathway that may have similar flux at each step. Proteins within the same cellular  
73 component (e.g., nucleus) are confined to the same physical volume. Supporting the  
74 idea that gene function determines abundance, it has been shown in genome-wide  
75 mRNA and protein studies that transcription factors exhibit low abundance (Drawid *et al.*  
76 2000; Ghaemmaghami *et al.* 2003; Vaquerizas *et al.* 2009) while protein synthesis and  
77 metabolism genes exhibit high abundance (Velculescu *et al.* 1997; Jansen and Gerstein  
78 2000; Nagalakshmi *et al.* 2008).

79  
80 In this study, we took a systematic genome-wide approach to investigate whether  
81 *S. cerevisiae* gene function (as indicated by gene membership in GO categories) is  
82 related to gene expression level. *S. cerevisiae* is suitable for this study because cell  
83 type-specific expression is not an issue, several genomic studies of RNA and protein  
84 abundance have been performed, and a large proportion of genes have been well-  
85 annotated. As an indicator of expression level, we mainly relied on mRNA abundance  
86 (though we confirmed some of our findings with protein abundance data) because  
87 protein abundance measurements are not consistent between studies and are limited in

88 their genome-coverage (Vogel 2013; Liu *et al.* 2016). Moreover, with the recent  
89 improvement of data quality, it has been found that mRNA levels are strong predictors  
90 of protein levels (Csárdi *et al.* 2015; Li *et al.* 2017), in contrast to earlier studies showing  
91 a weaker correlation between mRNA and protein abundance (Maier *et al.* 2009). In this  
92 study, we found that mRNA and protein levels of *S. cerevisiae* genes are highly  
93 correlated to levels of orthologous genes in *S. pombe*, supporting the notion that gene  
94 function, which is shared among orthologues, determines expression level. Then, we  
95 statistically analyzed the set of genes within each of 161 GO categories and found that  
96 many GO categories exhibit statistically significant expression extremes. For example,  
97 genes involved in translation or the cell wall are highly expressed while genes involved  
98 in chromosomal activities, such as replication and transcription, are weakly expressed.  
99 Furthermore, we wanted to test whether GO categories could be used to predict gene  
100 expression so we developed and optimized a linear model in which GO categories could  
101 be used to determine expression. Using this method, we were able to predict  
102 expression of *S. cerevisiae* and *S. pombe* genes with GO category information alone.  
103 Together, these data show that the function of a gene is a determinant of its expression  
104 level, adding to our understanding of the evolution of gene expression.

## 105 MATERIALS AND METHODS

### 106 ***S. cerevisiae* datasets**

107 RNA-seq datasets were downloaded from NCBI Gene Expression Omnibus (GEO) or  
108 Sequence Read Archive (SRA). *S. cerevisiae* sets included SRA048710 (Risso *et al.*  
109 2011), GSE43002 (Baker *et al.* 2013), GSE61783 (Adhikari and Cullen 2014),  
110 GSE52086 (Martín *et al.* 2014), GSE57155 (Fox *et al.* 2015), and GSE85595 (Bendjilali  
111 *et al.* 2017). Datasets that were published as SRA files were converted to FASTQ files  
112 with the SRA toolkit (Leinonen *et al.* 2011), trimmed with the FASTQ Quality Trimmer  
113 (Blankenberg *et al.* 2010) using a quality score of ten, mapped to the R64.1.1 2011-02-  
114 03 yeast genome (Engel *et al.* 2014) with TopHat2 (Kim *et al.* 2013), and converted into  
115 raw counts per gene with HTSeq (Anders *et al.* 2014). Gene counts were normalized for  
116 gene length and the total number of sequencing reads, thus generating RPKM (Reads  
117 Per Kilobase of transcript per Million mapped reads) (Mortazavi *et al.* 2008). In studies  
118 that did not provide the total number of mapped reads, the total number of reads that  
119 mapped to genes was used. Each replicate within a study was treated individually when  
120 averaging all replicates together; there were 18 total *S. cerevisiae* RNA-seq replicates.  
121 Protein abundance in *S. cerevisiae* was determined by mass spectrometry (Lawless *et*  
122 *al.* 2016). Paralogous proteins could not be distinguished in this study so were removed  
123 from our analysis, leaving absolute abundances for 1103 unique proteins. Gene names  
124 in all datasets were converted to systematic gene names using gene names from the  
125 Saccharomyces Genome Database (SGD) (Cherry *et al.* 2012). Cell cycle data  
126 generated in a separate study (Spellman *et al.* 1998) were downloaded from SGD. File

127 S1 contains *S. cerevisiae* gene names and normalized expression data. File S5  
128 contains gene ontology (GO) SLIM categories for each gene, downloaded from SGD.

129

### 130 ***S. pombe* expression datasets**

131 *S. pombe* gene names and their respective *S. cerevisiae* orthologues were obtained  
132 from PomBase (Wood *et al.* 2012; McDowall *et al.* 2015). *S. pombe* RPKM values were  
133 averaged from two RNA-seq datasets: GSE74411 (Mukherjee *et al.* 2016) and  
134 GSE80349 (Shah *et al.* 2016). Protein abundance in *S. pombe* was determined by  
135 integrating data from several studies (Wang *et al.* 2015); abundance data were  
136 downloaded from the Protein Abundance Database (PaxDb). File S2 contains *S. pombe*  
137 gene names and normalized expression data.

138

### 139 **Expression of each GO category**

140 The expression of genes within each GO category (e.g., “mRNA processing”) was  
141 summarized by four metrics: mean RPKM, median RPKM, mean rank median rank. For  
142 ranks, GO categories were ordered from least to highest RPKM (mean or median) and  
143 given a rank. Using these metrics, the expression of each GO category was compared  
144 to that of all genes. To determine whether the GO category differed significantly from all  
145 genes, the metric was compared to the respective metric of a randomly-selected set of  
146 the same size. This comparison was performed with  $10^7$  iterations, counting the number  
147 of iterations that resulted in a metric more extreme than the original metric for the  
148 category. More extreme refers to either tail of the distribution, depending on whether the  
149 original metric for the category was higher or lower than all genes. Thus,  $p =$  (number of



150 iterations resulting in a more-extreme metric) /  $10^7$ , and the p-value refers to the  
151 probability that the expression of genes within a GO category is either higher or lower  
152 than all genes by chance. This was performed in the R statistical language (Team  
153 2015), as shown in File S6. The p-values were corrected for multiple hypothesis testing,  
154 using the BH method (Benjamini and Hochberg 1995).

155

## 156 **Prediction**

157 The RPKM level of each gene was predicted based on its inclusion in each of the 163  
158 GO categories, according to this linear equation:

$$159 \quad E_g = \beta_1 \text{GO}^1_g + \beta_2 \text{GO}^2_g + \dots + \beta_{163} \text{GO}^{163}_g \quad (\text{Equation 1})$$

160 where  $E_g$  represents the predicted expression level for gene,  $g$ ;  $\beta_1$  through  $\beta_{163}$  are 163  
161 coefficients to be optimized; and  $\text{GO}^1_g$  through  $\text{GO}^{163}_g$  are binary numbers signifying  
162 whether gene  $g$  is present (=1) or absent (=0) in the respective GO category.

163 The 163  $\beta$  values were adjusted over  $10^6$  iterations using a random walk, with the  
164 goal of maximizing the correlation between the predicted expression ( $\log_{10}$ ) and the  
165 actual RPKM ( $\log_{10}$ ) for all genes. To begin, one of the 163  $\beta$  values was randomly  
166 chosen and then changed randomly up or down, with a step size of 1. If the change  
167 increased the correlation, then this specific change was repeated. To avoid reaching a  
168 local maximum, the change was repeated only 90% of the time. If the change  
169 decreased the correlation, then another random  $\beta$  value was chosen and changed. The  
170 iterations continued until a maximum correlation was achieved. This was carried out in  
171 R, as shown in File S7.

172

173 **Data availability**

174 File S1 lists *S. cerevisiae* genes and associated expression and cell-cycle data. File S2  
175 lists *S. pombe* genes and associated orthologue and expression data. File S3 lists GO  
176 categories and associated expression and statistics data. File S4 shows starting seeds  
177 and resulting beta values for 10 independent random walks. File S5 lists *S. cerevisiae*  
178 genes and their GO Slim categories, adopted from <https://www.yeastgenome.org>. File  
179 S6 is the R script which determines the significance of gene expression within each GO  
180 category. File S7 is the R script which performs a random walk to predict expression.  
181 Figure S1 depicts mRNA abundance across studies. Figures S2, S3, and S4 show the  
182 expression of all genes within 100 GO processes, 40 GO molecular functions, and 21  
183 GO cellular components, respectively. Figure S5 depicts the expression of cell cycle  
184 genes vs. non-cell cycle genes. Figure S6 shows the expression of genes within specific  
185 cell-cycle phases. Figure S7 shows that RPKM is correlated to protein abundance.  
186 Figure S8 compares the protein and RPKM datasets, regarding the number of genes  
187 per GO category. Figure S9 shows two independent random walks, to predict RPKM  
188 levels, generated similar  $\beta$  coefficients. Figure S10 graphs predicted vs. actual  
189 expression, with the “Cytoplasmic translation” genes colored in red. Figure S11 graphs  
190 predicted vs. actual expression of “Cytoplasmic translation” genes, with genes exhibiting  
191 an identical predicted expression value of 197.8 colored in red. Figure S12 shows the  
192 distribution of how many GO categories describe each gene. Figure S13 shows that GO  
193 categories can be used to predict protein abundance, using a random walk. Figure S14  
194 shows two independent random walks, to predict protein abundance, generated similar

195  $\beta$  coefficients. These files have been submitted to

196 <https://gsajournals.figshare.com/submit>.

197 RESULTS

198

199 *S. cerevisiae* genes exhibit an expression set point

200 We first evaluated whether each *S. cerevisiae* gene exhibits consistent steady-  
201 state mRNA abundance relative to all other genes. We monitored mRNA levels across  
202 eighteen independent samples drawn from six RNA-seq studies using the standard lab  
203 strains, S288C and Sigma, grown in rich media at 30°C. Transcript levels were  
204 calculated as RPKM values (Reads Per Kilobase of transcript per Million mapped  
205 reads), which have the benefit of allowing between-gene comparisons of mRNA  
206 abundance (Mortazavi *et al.* 2008). Figure S1 shows that the mRNA abundance of each  
207 gene is highly correlated across studies ( $r = 0.69$  to  $0.93$ ). These results indicate that  
208 each gene is maintained at an expression “set point.”

209

210 *S. cerevisiae* expression levels are correlated with orthologous genes in *S. pombe*

211 It has been shown that orthologous genes, which share function, between a  
212 diverse set of species including *S. cerevisiae*, *C. elegans*, *D. melanogaster* and *H.*  
213 *sapiens* exhibit highly similar abundances of both RNA and protein (Schrimpf *et al.*  
214 2009; Laurent *et al.* 2010; Khan *et al.* 2013), supporting the idea that function has an  
215 influence on abundance. We confirmed that this is the case even when comparing  
216 orthologous genes between *S. cerevisiae* and *S. pombe*, two species separated by 330-  
217 420 million years of evolution (Sipiczki 2000). Both mRNA and protein levels of  
218 orthologous genes are highly correlated between these yeast species (Figure 1). This

219 result further supports the hypothesis that gene function, which is conserved among  
220 orthologues, is important in determining expression levels.

221

### 222 Evaluating the expression level within each GO category

223 To more deeply explore how gene expression levels are related to gene function,  
224 we employed the GO Slim annotations at the Saccharomyces Genome Database  
225 (SGD) (Cherry *et al.* 2012). In the GO framework, experimental evidence is used to  
226 associate each gene with one or more GO annotations which describe biological  
227 processes, molecular functions, and cellular components. The SLIM annotations used  
228 here are unique to *S. cerevisiae* and were developed by SGD to broadly categorize  
229 genes into their functional groups. We employed this condensed set of annotations in  
230 order to test whether expression level varies across these broad functional categories.

231 We characterized the distribution of mRNA expression levels of genes  
232 associated with 100 biological processes (Figure 2A), 40 molecular functions (Figure  
233 2B), and 21 cellular components (Figure 2C). Organizing the categories into three  
234 panels facilitates appropriate comparisons; for example, comparing the two components  
235 “nucleus” and “cell wall” is more appropriate than comparing the component “nucleus” to  
236 the process “mRNA processing.” Each panel of Figure 2 is ordered by the median  
237 expression level of a GO category. Also shown are the mean expression levels, to test  
238 whether there is a skewed distribution of expression within categories. The complete  
239 distribution of expression levels within each GO category is depicted in Figures S2, S3  
240 and S4. These figures show that, while there is wide variation of expression values

241 within each GO category, some GO categories exhibit higher expression levels than  
242 others.

243 To test whether the distribution of expression levels in each GO category is  
244 significantly lower or higher than expected, we compared expression of genes within  
245 each GO category to a set randomly selected from the genome, as described in the  
246 Materials and Methods. This one-sided test generated a p-value for each GO category,  
247 equal to the probability that the distribution of expression values could occur by chance.  
248 The results are shown in heatmap format in Figure 2, with darker blue indicating greater  
249 significance (i.e., lower p-value). To ensure that the statistics are robust, four metrics  
250 were used to describe the distribution of expression levels in each GO category: median  
251 RPKM, mean RPKM, median rank, and mean rank. Three of the metrics (median  
252 RPKM, median rank, and mean rank) resulted in p-values that are remarkably similar,  
253 as shown by a similar shading of blue in Figure 2. In contrast, the mean RPKM metric  
254 often resulted in higher p-values. A likely explanation is that the mean RPKM of each  
255 category is influenced by outlier expression values, making the comparison to all genes  
256 less meaningful. It was for this reason that we decided to employ median and rank, in  
257 addition to mean, as metrics in our analyses.

258 We were concerned that our analyses would be biased by cell-cycle genes,  
259 which may have low expression because their expression is limited to a subset of the  
260 cell cycle. Surprisingly, the cell cycle genes, as identified previously (Spellman *et al.*  
261 1998), do not appear to be expressed less than non-cell-cycle genes (Figure S5). Upon  
262 closer examination, we found that the G<sub>1</sub> genes are expressed significantly less than  
263 non-G<sub>1</sub> genes (Figure S6). To rule out any cell-cycle effects on gene expression within

264 GO categories, we repeated the statistical tests on the entire gene set minus the 799  
265 cell-cycle genes (Figure 2). The p-values obtained were largely unchanged, as shown  
266 by the similar shading of blue in the heatmap, indicating that our results are not biased  
267 by cell-cycle genes.

268 Now that we have described the methodology employed to analyze expression  
269 within each GO Category, we will use the next three sections to explore how expression  
270 levels relate to (1) Biological Processes, (2) Molecular Functions, and (3) Cellular  
271 Components.

272

### 273 Expression of genes within GO Biological Processes

274 Figure 2A depicts the expression of the 100 GO Biological Processes ordered by  
275 median RPKM levels. Also, see File S3 for category statistics and Figure S2 to visualize  
276 the distribution of gene expression within each category. Several notable patterns are  
277 observed when considering the expression level within GO categories. To facilitate  
278 description of these patterns, we have grouped related GO terms (as shown by the  
279 colored points in Figure 2). First, there is a clear relationship between the GO terms and  
280 the Central Dogma (i.e., DNA → RNA → protein). Among the lowest expressed GO  
281 terms are those involving DNA processes (indicated by green points), such as  
282 “chromosome segregation” and “DNA repair.” Our statistical tests show that these  
283 categories exhibit significantly low expression. This is followed by terms describing  
284 aspects of transcription and RNA processes, such as “mRNA processing” and  
285 “transcription from RNA polymerase II promoter” (indicated by yellow points). The GO  
286 terms showing statistically high expression are related to aspects of translation and the

287 ribosome (indicated by red points). For this group, we included certain transcription  
288 terms (e.g., “transcription from RNA polymerase I promoter”) because these processes  
289 solely serve to create structural RNAs of the ribosome. The relationship between gene  
290 expression level and the role of the gene in the Central Dogma can be explained by  
291 “amplification”. In *S. cerevisiae*, experimental data show that when mRNA was detected  
292 for ~5854 genes, there were ~36,000 total mRNA molecules and 35 million proteins per  
293 haploid cell (Csárdi *et al.* 2015). Thus, the amplification from DNA to mRNA is 6-fold  
294 while the amplification from mRNA to protein is 972-fold. Another study measured the  
295 components of cell dry weight, which includes abundant rRNA molecules, and found  
296 that DNA amount is 20-fold less than RNA amount and that RNA amount is 5-fold less  
297 than protein amount (Feijó Delgado *et al.* 2013). As might be expected, our findings  
298 suggest that the measured cellular concentration of these biomolecules (i.e., DNA,  
299 mRNA, protein) is related to the expression level of the proteins that are tasked with  
300 synthesizing or maintaining the respective biomolecule.

301       The genes that participate in protein modification (orange points; e.g., “protein  
302 modification” and “protein acylation”) exhibit relatively high expression, but less so than  
303 the translation and ribosome genes. There could be two reasons for this, not  
304 necessarily mutually exclusive. First, each modification enzyme may only work on a  
305 subset of proteins while translation/ribosome proteins work on all proteins. Second,  
306 modification enzymes catalyze only one or few reactions on each polypeptide substrate  
307 while each translation/ribosome protein contributes to dozens or hundreds of peptide  
308 bond formation reactions to create a single polypeptide. In both cases, a modification



309 enzyme is likely less expressed than a translation/ribosome protein due to decreased  
310 flux through the enzyme.

311 Genes involved in several GO metabolic processes (dark blue points), such as  
312 “nucleobase-containing small molecule metabolic process,” are highly expressed,  
313 consistent with the large flux occurring through biosynthesis and energy production  
314 pathways. Interestingly, some metabolic processes, like “oligosaccharide metabolic  
315 process,” contain genes of low expression. This makes sense because the mRNA  
316 expression levels observed here are from yeast grown in the monosaccharide glucose  
317 as the carbon source, not from yeast grown in oligosaccharides.

318 The GO categories associated with transport (blue points) deserve mention  
319 because they are among the highest and lowest expressed. The highest among the  
320 Transport categories is “nucleobase-containing compound transport”, which facilitates  
321 the much-needed transport of nucleobases for metabolism. The next highest category is  
322 “nuclear transport” comprised of genes involved in the nuclear pore and in export of  
323 ribosomal RNA, both important for translation. On the other hand, certain Transport  
324 categories, such as “carbohydrate transport,” exhibit low expression, which is not  
325 surprising given that the cells were grown in excess glucose, which represses certain  
326 types of sugar import (Ozcan and Johnston 1999).

327 Finally, GO categories related to Cell Fate (light blue points) mainly show low  
328 expression. This is consistent with the cells being cultured under asexual rich-media  
329 conditions and thus not faced with cell fate decisions (e.g., meiosis, mating, invasive  
330 growth). Surprisingly, “mitotic cell cycle” exhibited low expression, despite the cells  
331 undergoing exponential growth. A possible factor is that many of the cell cycle genes

332 are involved in signal transduction and transcriptional regulation, both of which exhibit  
333 low expression. Specifically, “signaling” is 36<sup>th</sup> lowest out of 100 GO Processes, and  
334 “nucleic acid binding transcription factor activity” is the lowest out of 40 GO Functions.

335

### 336 Expression of genes within GO Molecular Functions

337 Figure 2B shows the expression of the 40 GO Molecular Functions ordered by  
338 median RPKM levels. Also, see File S3 for category statistics and Figure S3 to visualize  
339 the distribution of gene expression within each category. Again, the relationship  
340 between GO terms and the Central Dogma is apparent. Among the lowest expressed  
341 GO terms are those involving DNA processes (green points), such as “nuclease activity”  
342 and “DNA binding.” We included “nucleic acid binding transcription factor activity” and  
343 “transcription factor binding” in the DNA group because the proteins (transcription  
344 factors and their regulators) within these categories mainly bind to DNA. The proteins  
345 do not participate in the high-flux enzymatic steps of transcription and RNA processing,  
346 but instead bind to a limited number of sites on the DNA. Generally exhibiting higher  
347 expression are categories such as “RNA binding” that describe aspects of transcription  
348 and RNA processes (yellow points). Finally, GO terms such as “translation factor  
349 activity, RNA binding” that describe aspects of translation and the ribosome exhibit the  
350 highest expression (red points).

351 Like the GO processes in Figure 2A, the GO Functions that are involved in  
352 protein modification (indicated by orange points in Figure 2B) exhibit relatively high  
353 expression but reduced expression compared to translation and ribosome categories.

354 An example is “unfolded protein binding,” the third highest Function, which can be  
355 compared to the related “protein folding,” the fifth highest Process.

356 Also notable are the two transport-related GO Functions (“protein transporter  
357 activity” and “transmembrane transporter activity”) which are relatively highly expressed  
358 (blue points). There are only two transport-related Functions compared to 10 transport-  
359 related Processes (Figure 2A). When observing the 10 Processes, there is much more  
360 variation in expression levels, indicating that some of this variation is lost when grouping  
361 genes into only 2 categories.

362

### 363 Expression of genes within GO Cellular Components

364 Figure 2C shows the expression of the 21 GO Cellular Components ordered by  
365 median RPKM levels. Also, see File S3 for category statistics and Figure S4 to visualize  
366 the distribution of gene expression within each category. Consistent with our previously  
367 established relationship between expression and the Central Dogma, categories  
368 involving DNA processes (“microtubule organizing center” and “chromosome,”) show  
369 low expression while categories involving Translation/Ribosome (“nucleolus” and  
370 “ribosome,”) exhibit high expression. There are no Cellular Component categories that  
371 capture only RNA/Transcription genes.

372 Categories related to Cell Fate (“cellular bud” and “site of polarized growth,”)   
373 exhibited relatively low expression, possibly because these cellular locations are short-  
374 lived and comprise a small space. As expected, the genes within the cytoplasm are  
375 expressed at higher levels than genes within the nucleus, a cellular component with a  
376 volume substantially less than that of the cytoplasm (Jorgensen *et al.* 2007).

377 Additionally, genes within the categories “Extracellular Region” and “Cell Wall” are  
378 highly expressed, likely due to the vast number of proteins needed to populate these  
379 spaces (de Groot *et al.* 2009).

380

### 381 Gene function is also associated with protein expression

382         So far, we have shown that mRNA levels are correlated with gene function. Since  
383 proteins actually carry out the function, we also attempted to associate protein levels  
384 with function. This task was hindered because quantitative data for protein levels is  
385 lacking. Not only is it difficult to detect levels for many proteins, abundance  
386 measurements are not consistent between the limited number of studies (Vogel and  
387 Marcotte 2012; Liu *et al.* 2016). We identified one recent study that determine the  
388 absolute abundances of 1103 *S. cerevisiae* proteins with high-quality by using mass  
389 spectrometry with internal controls (Lawless *et al.* 2016). We found that the measured  
390 protein abundance is highly correlated ( $r=0.61$ ) with the RPKM values that we used here  
391 (Figure S7). Next, we compared protein expression within each GO category with  
392 mRNA expression within each category (Figure 3A). There was only a modest  
393 correlation ( $r=0.44$ ). We hypothesized that the low correlation is due to the small  
394 number of genes in the protein dataset and the resulting smaller number of genes per  
395 GO category (Figure S8). To control for this discrepancy in number of genes per  
396 category, we calculated the median RPKM for each GO category using only the 1103  
397 genes that are in the protein dataset. Then, we compared the RPKM of each GO  
398 category with the corresponding protein abundance (Figure 3B). There was a high

399 correlation ( $r=0.81$ ), suggesting that gene function, as defined by GO categories, has an  
400 effect not only on mRNA levels but on protein levels as well.

401

#### 402 Gene function can predict expression levels

403 As described above, we found that the genes in each GO Category have distinct  
404 expression levels. We wondered whether gene function, as assessed by a gene's  
405 membership in GO categories, can be used to predict expression level. To test this, we  
406 developed a linear equation in which the RPKM of each gene is determined by the  
407 gene's inclusion in each of the 163 GO categories (see Materials and Methods). Each  
408 GO category was assigned a coefficient ( $\beta$ ), which was optimized using a random walk,  
409 with the goal of accurately predicting the expression of each gene. Prediction accuracy  
410 was assessed by correlating the predicted vs. the actual expression of all genes. As  
411 shown in Figure 4A, as the random walk progressed over 10,000 iterations, the  
412 correlation increased until a maximum of 0.44 was reached. The correlation did not  
413 increase further, even when the walk was performed with  $10^7$  iterations (data not  
414 shown). Additionally, when the random walk was initiated 10 independent times with  
415 randomly-chosen  $\beta$  coefficients, the same correlation (0.44) and  $\beta$  coefficients were  
416 obtained (File S4). For example, Figure S9 shows a linear relationship between the  $\beta$   
417 coefficients of the 2<sup>nd</sup> and 3<sup>rd</sup> repeats. As might be expected, the GO categories that  
418 had a high coefficient (e.g., "cytoplasmic translation") were among the highest  
419 expressed categories. In contrast, the GO categories that had a low coefficient (e.g.,  
420 "cellular respiration") were not always the lowest expressed categories; this suggests

421 that these categories, in combination with other GO categories, play a complicated and  
422 additive role in prediction.

423 The predicted expression vs. actual expression of each gene is depicted in  
424 Figure 4B. This graph shows that there is a modest correlation between predicted and  
425 actual expression. A notable feature of the graph is that some genes can be grouped  
426 together into a vertical line; in such a group, each gene has the same predicted  
427 expression but a variety of actual expression levels. This is likely caused by having  
428 incomplete functional information; the genes are predicted to have the same expression  
429 level because they are in the same GO category and are not functionally differentiated  
430 by other informative GO categories. An interesting example is the set of genes in the  
431 “cytoplasmic translation” category (Figure S10). As expected, these genes are predicted  
432 to have high expression. A subset of these genes was predicted to have identical  
433 expression but actually vary in expression (Figure S11). The reason that these genes  
434 are predicted to have the same expression level is that they share membership in the  
435 same 5 GO categories (cytoplasm, cytoplasmic translation, ribosome, structural  
436 constituent of ribosome, structural molecule activity). If these genes had additional  
437 functional information, the prediction would likely be more accurate.

438 To further test this idea, we limited our prediction to genes associated with a  
439 minimum number of GO categories. Genes show a wide-range in the number of GO  
440 categories assigned to them (Figure S12), from 0 to 35, presumably attributable to the  
441 degree to which the genes have been studied. As we expected, when the prediction  
442 was limited to genes associated with a larger number of GO categories, the prediction  
443 increased in accuracy, as shown by a higher correlation between predicted and actual

444 expression (Figure 5). It should be noted that as the minimum number of GO categories  
445 increases, the number of genes dramatically decreases (blue line in Figure 5).  
446 Regardless, these results suggest that having more information about gene function  
447 improves the ability to predict gene expression levels.

448 In our prediction analysis above, we created a model that predicts gene  
449 expression based on gene function. We wanted to test whether this model, developed  
450 with *S. cerevisiae* GO annotations, can be used to predict expression levels of the  
451 orthologous genes in *S. pombe*. Indeed, we found that there was a high correlation  
452 ( $r=0.54$ ) between our predicted expression values and actual expression in *S. pombe*  
453 (Figure 6).

454 Finally, we wanted to test whether gene function can also be used to predict  
455 protein abundance. We used the same linear equation and random walk as above, but  
456 performed the random walk with protein abundance values (Lawless *et al.* 2016) in  
457 place of RPKM values. As the random walk progressed over  $10^5$  iterations, the  
458 correlation increased up to a maximum of 0.62 (Figure S13), a correlation that is even  
459 higher than the one generated using RPKM values in the random walk. The random  
460 walk was initiated 10 independent times with randomly-chosen  $\beta$  coefficients,  
461 generating the same correlation and  $\beta$  coefficients each time. For example, Figure S14  
462 shows a linear relationship between the  $\beta$  coefficients of the 1<sup>st</sup> and 5<sup>th</sup> repeats. The  $\beta$   
463 coefficients obtained with protein data versus RPKM data were somewhat consistent  
464 (compare Figure S9 with Figure S14). In both analyses, the  $\beta$  coefficient for “generation  
465 of precursor metabolites and energy” was among the highest and that of “cellular  
466 respiration” was among the lowest.

467

## DISCUSSION

468 RNA and protein levels increase or decrease upon changing cellular conditions,  
469 giving rise to the concept of differential expression. This concept is important in  
470 understanding tissue- and condition-specific gene expression and is used to determine  
471 which gene functions are important in a given environment. In contrast, we focus here  
472 not on changes in expression, but on absolute steady-state abundances of mRNA and  
473 protein. According to cost-benefit analysis, the abundance of each gene product should  
474 be controlled (Wagner 2005; Dekel and Alon 2005; Lang *et al.* 2009). The costs are  
475 two-fold: energy consumed during transcription and translation as well as mass that is  
476 added to the already-packed volume of the cell (Dill *et al.* 2011). The benefit is to  
477 perform a necessary cellular function. There is a balance between cost and benefit,  
478 resulting in a steady-state set point that provides maximal fitness for the cell and  
479 organism. Indeed, we have found here that, at least in one condition, there is an  
480 expression set point for each gene. This leads to the question of what factors determine  
481 the set point for a gene. We hypothesized that the function of the protein product would  
482 be an important determinant. We could test this by employing the gene ontology (GO)  
483 framework which systematically describes gene function. Specifically, we predicted that  
484 genes sharing a GO category would exhibit similar expression. The GO framework  
485 divides function into three domains: molecular function, biological process, and cellular  
486 component. First, proteins with the same molecular function need to be maintained at  
487 the same cellular concentration because they will have similar biochemical properties  
488 (e.g.,  $K_m$ ,  $k_{cat}$ ) and work on substrates of similar concentrations. Supporting this idea,  
489 when bacteria are grown long-term in different levels of the substrate, lactose, the cells



490 evolve to express a proportional level of the LacZ enzyme (Dekel and Alon 2005).  
491 Second, proteins that participate in the same biological process should be kept at the  
492 same concentration because they are components of a pathway with similar flux at each  
493 step. Proteins within the same cellular component should be of related abundances in  
494 order to achieve similar protein concentrations in a defined physical volume.

495 Several analyses presented here support the conclusion that gene function is an  
496 important factor in determining gene expression. First, we found that mRNA and protein  
497 levels are correlated between *S. cerevisiae* genes and their orthologous genes in *S.*  
498 *pombe*, showing that the expression level of functionally-related genes has been  
499 conserved over millions of years. This finding is consistent with cross-species  
500 correlations between other organisms (Schrimpf *et al.* 2009; Laurent *et al.* 2010; Khan  
501 *et al.* 2013). Second, we found that gene expression within several GO categories is  
502 significantly higher or lower than seen in the entire genome. Interestingly, genes  
503 involved in the Central Dogma follow a pattern. DNA-related genes are expressed the  
504 least, transcription-related genes are in the middle, and translation-related genes are  
505 expressed the most. As discussed above, this finding fits in with the amplification of  
506 biomolecules that occurs in the Central Dogma. Third, we were able to use GO terms  
507 alone in calculating gene expression levels. A linear model was created using *S.*  
508 *cerevisiae* GO and gene expression information, but then it was successfully used to  
509 predict *S. pombe* gene expression. Fourth, while we primarily relied on the plethora of  
510 high-quality RNA-seq data, we also performed analysis with protein data, obtaining  
511 similar results. This last point is critical since we assume that gene function is most  
512 closely associated with the abundance of proteins, the factors that directly perform the

513 cellular functions. Consistently, protein levels are under greater evolutionary constraints  
514 than mRNA levels (Khan *et al.* 2013), likely because fitness relies more on the optimal  
515 protein level. However, protein abundance data is not always as accurate as mRNA  
516 abundance data and does not cover much of the genome (Vogel and Marcotte 2012;  
517 Liu *et al.* 2016). With future advances in measuring protein abundance, this study can  
518 be repeated with high-quality genome-wide protein data.

519 Our work here has shown that gene function (as defined by biological process,  
520 molecular function and cellular component) is a strong determinant of gene expression  
521 level. This has implications for how gene expression has evolved within the biochemical  
522 constraints of a cell. The constraints (e.g., organelle volume, substrate concentration,  
523 optimal flux through each pathway, and the energy requirements of transcription and  
524 translation) governing the expression of each protein can be estimated by the protein's  
525 associated GO categories. However, GO categories alone might not accurately capture  
526 these constraints. The categories are proxies for other biochemical features of the  
527 protein. In this case, it might be important to determine whether more specific features,  
528 like  $K_m$  or cellular substrate concentration, are important in driving gene expression  
529 levels.

530 For gene function, we used the GO Slim annotations at the *Saccharomyces*  
531 Genome Database (SGD) (Cherry *et al.* 2012). While these annotations were useful for  
532 the initial study of gene function and gene expression, it would be useful to carry out  
533 future studies with the entire set of GO terms (Ashburner *et al.* 2000; Boyle *et al.* 2004).  
534 This will be especially useful for predicting gene expression as there would be additional  
535 information describing gene function. For example, instead of a gene simply associated

536 with “transcription factor binding,” the gene may be labeled as being part of “the core  
537 TFIIH complex when it is part of the general transcription factor TFIIH,” a term that could  
538 be a better predictor of gene expression. In addition, as genes are further  
539 characterized, they will receive additional GO annotations that will improve the accuracy  
540 of prediction. As we observed here, genes associated with a larger number of GO  
541 categories could be more accurately predicted.

542 This analysis was performed primarily with expression data obtained from a  
543 particular strain of the yeast *S. cerevisiae*, grown in rich media. It was important to study  
544 expression in one condition to examine levels that are maintained at steady-state.  
545 However, our results may be biased by condition-specific effects. For example, a large  
546 set of genes is subject to glucose-repression under rich media conditions (Kayikci and  
547 Nielsen 2015) and thus would be labeled as poorly expressed simply because  
548 transcription was turned off. When these genes are relieved of glucose repression, they  
549 may be highly expressed. To deal with this issue, one could perform this analysis using  
550 the highest observed abundance for each gene. Practically, this could be done in *S.*  
551 *cerevisiae*, since genome-wide expression has been monitored across hundreds of  
552 conditions. Thus, the abundance value obtained for each gene would be the maximum  
553 and represent the level when the gene is “turned on.” This way, the expression level of  
554 all genes can be fairly compared. This could even be performed in other species, such  
555 as humans, that have a large number of both RNA-seq studies and GO annotations.

556 In predicting gene expression levels, we fit GO category information into a linear  
557 equation and optimized the coefficients with a random walk. We achieved a decent  
558 correlation ( $r=0.44$ ) between prediction and observed, especially considering that the

559 predictions were on a continuous scale and that we predicted the expression of 6,717  
560 genes. However, other machine learning approaches may be more effective at  
561 estimating expression levels. These approaches include neural net, decision tree, naïve  
562 Bayes, and alternative mathematical models. The relationship between gene function  
563 and expression level is likely complex and further work is needed to determine the type  
564 of model that best takes into account all of the evolutionary forces that dictate gene  
565 expression levels.

566

## ACKNOWLEDGMENTS

567

568 This work was supported by funds from Rowan University and NIH 1R15GM113187 to

569 M.J.H.

570

## LITERATURE CITED

- 571 Adhikari H., Cullen P. J., 2014 Metabolic Respiration Induces AMPK- and Ire1p-  
572 Dependent Activation of the p38-Type HOG MAPK Pathway. *PLoS Genet* **10**:  
573 e1004734.
- 574 Anders S., Pyl P. T., Huber W., 2014 *HTSeq A Python framework to work with high-*  
575 *throughput sequencing data*.
- 576 Ashburner M., Ball C. A., Blake J. A., Botstein D., Butler H., Cherry J. M., Davis A. P.,  
577 Dolinski K., Dwight S. S., Eppig J. T., Harris M. A., Hill D. P., Issel-Tarver L.,  
578 Kasarskis A., Lewis S., Matese J. C., Richardson J. E., Ringwald M., Rubin G. M.,  
579 Sherlock G., 2000 Gene ontology: tool for the unification of biology. The Gene  
580 Ontology Consortium. *Nat Genet* **25**: 25–29.
- 581 Baker L. A., Ueberheide B. M., Dewell S., Chait B. T., Zheng D., Allis C. D., 2013 The  
582 yeast Snt2 protein coordinates the transcriptional response to hydrogen peroxide-  
583 mediated oxidative stress. *Mol. Cell. Biol.* **33**: 3735–3748.
- 584 Bendjilali N., MacLeon S., Kalra G., Willis S. D., Hossian A. K. M. N., Avery E.,  
585 Wojtowicz O., Hickman M. J., 2017 Time-Course Analysis of Gene Expression  
586 During the *Saccharomyces cerevisiae* Hypoxic Response. *G3 (Bethesda)* **7**: 221–  
587 231.
- 588 Benjamini Y., Hochberg Y., 1995 Controlling the False Discovery Rate: A Practical and  
589 Powerful Approach to Multiple Testing on JSTOR. *Journal of the Royal Statistical*  
590 *Society Series B* ....
- 591 Blankenberg D., Gordon A., Kuster Von G., Coraor N., Taylor J., Nekrutenko A., Team  
592 T. G., 2010 Manipulation of FASTQ data with Galaxy. ....
- 593 Boyle E. I., Weng S., Gollub J., Jin H., Botstein D., Cherry J. M., Sherlock G., 2004  
594 GO::TermFinder--open source software for accessing Gene Ontology information  
595 and finding significantly enriched Gene Ontology terms associated with a list of  
596 genes. *Bioinformatics* **20**: 3710–3715.
- 597 Cherry J. M., Hong E. L., Amundsen C., Balakrishnan R., Binkley G., Chan E. T.,  
598 Christie K. R., Costanzo M. C., Dwight S. S., Engel S. R., Fisk D. G., Hirschman J.  
599 E., Hitz B. C., Karra K., Krieger C. J., Miyasato S. R., Nash R. S., Park J., Skrzypek  
600 M. S., Simison M., Weng S., Wong E. D., 2012 *Saccharomyces Genome Database:*  
601 *the genomics resource of budding yeast*. *Nucleic Acids Research* **40**: D700–5.
- 602 Conesa A., Madrigal P., Tarazona S., Gomez-Cabrero D., Cervera A., McPherson A.,  
603 Szcześniak M. W., Gaffney D. J., Elo L. L., Zhang X., Mortazavi A., 2016 A survey  
604 of best practices for RNA-seq data analysis. *Genome Biol* **17**: 13.
- 605 Csárdi G., Franks A., Choi D. S., Airoidi E. M., Drummond D. A., 2015 Accounting for  
606 experimental noise reveals that mRNA levels, amplified by post-transcriptional

- 607 processes, largely determine steady-state protein levels in yeast. *PLoS Genet* **11**:  
608 e1005206.
- 609 de Groot P. W. J., Brandt B. W., Horiuchi H., Ram A. F. J., de Koster C. G., Klis F. M.,  
610 2009 Comprehensive genomic analysis of cell wall genes in *Aspergillus nidulans*.  
611 *Fungal Genetics and Biology* **46**: S72–S81.
- 612 Dekel E., Alon U., 2005 Optimality and evolutionary tuning of the expression level of a  
613 protein. *Nature* **436**: 588–592.
- 614 Dill K. A., Ghosh K., Schmit J. D., 2011 Physical limits of cells and proteomes. *Proc.*  
615 *Natl. Acad. Sci. U.S.A.* **108**: 17876–17882.
- 616 Dolinski K., Botstein D., 2007 Orthology and Functional Conservation in Eukaryotes.  
617 *Annu. Rev. Genet.* **41**: 465–507.
- 618 Drawid A., Jansen R., Gerstein M., 2000 Genome-wide analysis relating expression  
619 level with protein subcellular localization. *Trends Genet.* **16**: 426–430.
- 620 Engel S. R., Dietrich F. S., Fisk D. G., Binkley G., Balakrishnan R., Costanzo M. C.,  
621 Dwight S. S., Hitz B. C., Karra K., Nash R. S., Weng S., Wong E. D., Lloyd P.,  
622 Skrzypek M. S., Miyasato S. R., Simison M., Cherry J. M., 2014 The reference  
623 genome sequence of *Saccharomyces cerevisiae*: then and now. *G3 (Bethesda)* **4**:  
624 389–398.
- 625 Feijó Delgado F., Cermak N., Hecht V. C., Son S., Li Y., Knudsen S. M., Olcum S.,  
626 Higgins J. M., Chen J., Grover W. H., Manalis S. R., 2013 Intracellular water  
627 exchange for measuring the dry mass, water mass and changes in chemical  
628 composition of living cells. *PLoS ONE* **8**: e67590.
- 629 Fox M. J., Gao H., Smith-Kinnaman W. R., Liu Y., Mosley A. L., 2015 The Exosome  
630 Component Rrp6 Is Required for RNA Polymerase II Termination at Specific  
631 Targets of the Nrd1-Nab3 Pathway (J Corden, Ed.). *PLoS Genet* **11**: e1004999.
- 632 Ghaemmaghami S., Huh W.-K., Bower K., Howson R. W., Belle A., Dephoure N.,  
633 O'Shea E. K., Weissman J. S., 2003 Global analysis of protein expression in yeast.  
634 *Nature* **425**: 737–741.
- 635 Jansen R., Gerstein M., 2000 Analysis of the yeast transcriptome with structural and  
636 functional categories: characterizing highly expressed proteins. *Nucleic Acids*  
637 *Research* **28**: 1481–1488.
- 638 Jorgensen P., Edgington N. P., Schneider B. L., Rupes I., Tyers M., Fitcher B., 2007  
639 The size of the nucleus increases as yeast cells grow. *Mol. Biol. Cell* **18**: 3523–  
640 3532.
- 641 Kayikci Ö., Nielsen J., 2015 Glucose repression in *Saccharomyces cerevisiae*. *FEMS*  
642 *Yeast Research* **15**.

- 643 Khan Z., Ford M. J., Cusanovich D. A., Mitrano A., Pritchard J. K., Gilad Y., 2013  
644 Primate transcript and protein expression levels evolve under compensatory  
645 selection pressures. *Science* **342**: 1100–1104.
- 646 Kim D., Pertea G., Trapnell C., Pimentel H., Kelley R., Salzberg S. L., 2013 TopHat2:  
647 accurate alignment of transcriptomes in the presence of insertions, deletions and  
648 gene fusions. *Genome Biol* **14**: R36.
- 649 Lang G. I., Murray A. W., Botstein D., 2009 The cost of gene expression underlies a  
650 fitness trade-off in yeast. *Proc. Natl. Acad. Sci. U.S.A.* **106**: 5755–5760.
- 651 Laurent J. M., Vogel C., Kwon T., Craig S. A., Boutz D. R., Huse H. K., Nozue K., Walia  
652 H., Whiteley M., Ronald P. C., Marcotte E. M., 2010 Protein abundances are more  
653 conserved than mRNA abundances across diverse taxa. *Proteomics* **10**: 4209–  
654 4212.
- 655 Lawless C., Holman S. W., Brownridge P., Lanthaler K., Harman V. M., Watkins R.,  
656 Hammond D. E., Miller R. L., Sims P. F. G., Grant C. M., Evers C. E., Beynon R. J.,  
657 Hubbard S. J., 2016 Direct and Absolute Quantification of over 1800 Yeast Proteins  
658 via Selected Reaction Monitoring. *Mol. Cell Proteomics* **15**: 1309–1322.
- 659 Leinonen R., Sugawara H., Shumway M., International Nucleotide Sequence Database  
660 Collaboration, 2011 The sequence read archive. *Nucleic Acids Research* **39**: D19–  
661 21.
- 662 Li J. J., Chew G.-L., Biggin M. D., 2017 Quantitating Translational Control: mRNA  
663 Abundance-Dependent and Independent Contributions. *bioRxiv*: 116913.
- 664 Liu Y., Beyer A., Aebersold R., 2016 On the Dependency of Cellular Protein Levels on  
665 mRNA Abundance. *Cell* **165**: 535–550.
- 666 Maier T., Güell M., Serrano L., 2009 Correlation of mRNA and protein in complex  
667 biological samples. *FEBS Letters* **583**: 3966–3973.
- 668 Martín G. M., King D. A., Green E. M., Garcia-Nieto P. E., Alexander R., Collins S. R.,  
669 Krogan N. J., Gozani O. P., Morrison A. J., 2014 Set5 and Set1 cooperate to  
670 repress gene expression at telomeres and retrotransposons. *Epigenetics* **9**: 513–  
671 522.
- 672 McDowall M. D., Harris M. A., Lock A., Rutherford K., Staines D. M., Bähler J., Kersey  
673 P. J., Oliver S. G., Wood V., 2015 PomBase 2015: updates to the fission yeast  
674 database. *Nucleic Acids Research* **43**: D656–61.
- 675 Mortazavi A., Williams B. A., McCue K., Schaeffer L., Wold B., 2008 Mapping and  
676 quantifying mammalian transcriptomes by RNA-Seq. *Nat Meth* **5**: 621–628.



- 677 Mukherjee K., Gardin J., Futcher B., Leatherwood J., 2016 Relative contributions of the  
678 structural and catalytic roles of Rrp6 in exosomal degradation of individual mRNAs.  
679 RNA **22**: 1311–1319.
- 680 Nagalakshmi U., Wang Z., Waern K., Shou C., Raha D., Gerstein M., Snyder M., 2008  
681 The transcriptional landscape of the yeast genome defined by RNA sequencing.  
682 Science **320**: 1344–1349.
- 683 Ozcan S., Johnston M., 1999 Function and regulation of yeast hexose transporters.  
684 Microbiol. Mol. Biol. Rev. **63**: 554–569.
- 685 Risso D., Schwartz K., Sherlock G., Dudoit S., 2011 GC-content normalization for RNA-  
686 Seq data. BMC Bioinformatics **12**: 480.
- 687 Schrimpf S. P., Weiss M., Reiter L., Ahrens C. H., Jovanovic M., Malmström J., Brunner  
688 E., Mohanty S., Lercher M. J., Hunziker P. E., Aebersold R., Mering von C.,  
689 Hengartner M. O., 2009 Comparative functional analysis of the *Caenorhabditis*  
690 *elegans* and *Drosophila melanogaster* proteomes. Plos Biol **7**: e48.
- 691 Shah M., Su D., Scheliga J. S., Pluskal T., Boronat S., Motamedchaboki K., Campos A.  
692 R., Qi F., Hidalgo E., Yanagida M., Wolf D. A., 2016 A Transcript-Specific eIF3  
693 Complex Mediates Global Translational Control of Energy Metabolism. Cell Rep **16**:  
694 1891–1902.
- 695 Sipiczki M., 2000 Where does fission yeast sit on the tree of life? Genome Biol **1**:  
696 REVIEWS1011.
- 697 Spellman P. T., Sherlock G., Zhang M. Q., Iyer V. R., Anders K., Eisen M. B., Brown P.  
698 O., Botstein D., Futcher B., 1998 Comprehensive identification of cell cycle-  
699 regulated genes of the yeast *Saccharomyces cerevisiae* by microarray hybridization.  
700 Mol. Biol. Cell **9**: 3273–3297.
- 701 Team R. C., 2015 *R: A Language and Environment for Statistical Computing*. URL:  
702 [http:// www. R-project. org](http://www.R-project.org), Vienna.
- 703 Vaquerizas J. M., Kummerfeld S. K., Teichmann S. A., Luscombe N. M., 2009 A census  
704 of human transcription factors: function, expression and evolution. Nature Reviews  
705 Genetics **10**: 252–263.
- 706 Velculescu V. E., Zhang L., Zhou W., Vogelstein J., Basrai M. A., Bassett D. E., Hieter  
707 P., Vogelstein B., Kinzler K. W., 1997 Characterization of the yeast transcriptome.  
708 Cell **88**: 243–251.
- 709 Vogel C., 2013 Evolution. Protein expression under pressure. Science **342**: 1052–1053.
- 710 Vogel C., Marcotte E. M., 2012 Insights into the regulation of protein abundance from  
711 proteomic and transcriptomic analyses. Nature Reviews Genetics **13**: 227–232.

- 712 Wagner A., 2005 Energy Constraints on the Evolution of Gene Expression. *Mol. Biol.*  
713 *Evol.* **22**: 1365–1374.
- 714 Wang M., Herrmann C. J., Simonovic M., Szklarczyk D., Mering von C., 2015 Version  
715 4.0 of PaxDb: Protein abundance data, integrated across model organisms, tissues,  
716 and cell-lines. *Proteomics* **15**: 3163–3168.
- 717 Wittkopp P. J., 2014 Evolution of Gene Expression. In: Losos JB, Baum DA, Futuyma  
718 DJ, Hoekstra HE, Lenski RE, Moore AJ, Peichel CL, Schluter D, Whitlock MJ (Eds.),  
719 *The Princeton Guide to Evolution*, Princeton University Press, Princeton, pp. 413–  
720 419.
- 721 Wood V., Harris M. A., McDowall M. D., Rutherford K., Vaughan B. W., Staines D. M.,  
722 Aslett M., Lock A., Bähler J., Kersey P. J., Oliver S. G., 2012 PomBase: a  
723 comprehensive online resource for fission yeast. *Nucleic Acids Research* **40**: D695–  
724 9.

725 FIGURE LEGENDS

726

727 **Figure 1** The expression of orthologous genes in *S. cerevisiae* and *S. pombe* are highly  
728 correlated. **(A)** Comparison of protein abundances between orthologous genes in *S.*  
729 *pombe* and *S. cerevisiae* ( $r=0.67$ ,  $n=111$ ). **(B)** Comparison of RPKM values between  
730 orthologous genes in *S. pombe* and *S. cerevisiae* ( $r=0.63$ ,  $n=1118$ ).

731

732 **Figure 2** The mRNA abundance of genes within each GO Category: **(A)** Biological  
733 Processes, **(B)** Molecular Functions, and **(C)** Cellular Components. Each panel is  
734 organized in the same manner. The GO categories are ordered from left-to-right with  
735 increasing RPKM median. The first two rows are in heatmap format and depict the  
736 mean and median, respectively, of each GO category; black signifies genome-wide  
737 mean or median, red signifies higher than genome, and green signifies lower than  
738 genome. Rows 3-6 are in heatmap format and depict the probabilities that the mean or  
739 median differs from the genome-wide mean or median by chance, using random  
740 sampling with four different metrics; as the intensity of blue increases, the p-value  
741 decreases (minimum  $p=10^{-7}$ ). Removing the 799 cell cycle genes from the analysis had  
742 little effect on the probabilities (rows 7-10). Finally, the median RPKM ( $\log_{10}$ ) of each  
743 GO category was plotted; GO categories representing related functions (e.g., DNA)  
744 were merged into groups and colored, as described in the Materials and Methods and in  
745 File S3.

746 **Figure 3** The median mRNA abundance of each GO category is similar to the median  
747 protein abundance. **(A)** For each GO category, the median protein abundance is plotted

748 against the median RPKM. Note that the protein abundance dataset only includes 1103  
749 genes. **(B)** For each GO category, the median RPKM abundance (calculated from the  
750 1103 genes in the protein data set) is plotted against the median protein abundance.

751  
752 **Figure 4** GO categories alone can be used to predict gene expression levels. **(A)** A  
753 random walk was performed to optimize the  $\beta$  coefficients of each GO category in  
754 predicting expression, as described in the Materials and Methods. The graph depicts  
755 the iteration number vs. the correlation between predicted and actual RPKM values of  
756 all genes. **(B)** Shown is the predicted expression (x-axis with arbitrary scale) vs. the  
757 actual  $\log_{10}(\text{RPKM})$  in *S. cerevisiae*.

758  
759 **Figure 5** Limiting prediction to genes with a minimum number of GO categories  
760 improves the correlation between predicted and actual expression (black line). Also, as  
761 the minimum increases, the number of genes meeting or surpassing this minimum  
762 decreases (blue line). In the inset graph, the range of the “number of genes” axis is 0 to  
763 100.

764  
765 **Figure 6** Gene function in *S. cerevisiae* can be used to predict expression of  
766 orthologues genes in *S. pombe*. Shown is the predicted expression of *S. cerevisiae*  
767 genes (x-axis with arbitrary scale) vs. the actual  $\log_{10}(\text{RPKM})$  of their respective  
768 orthologs in *S. pombe*.

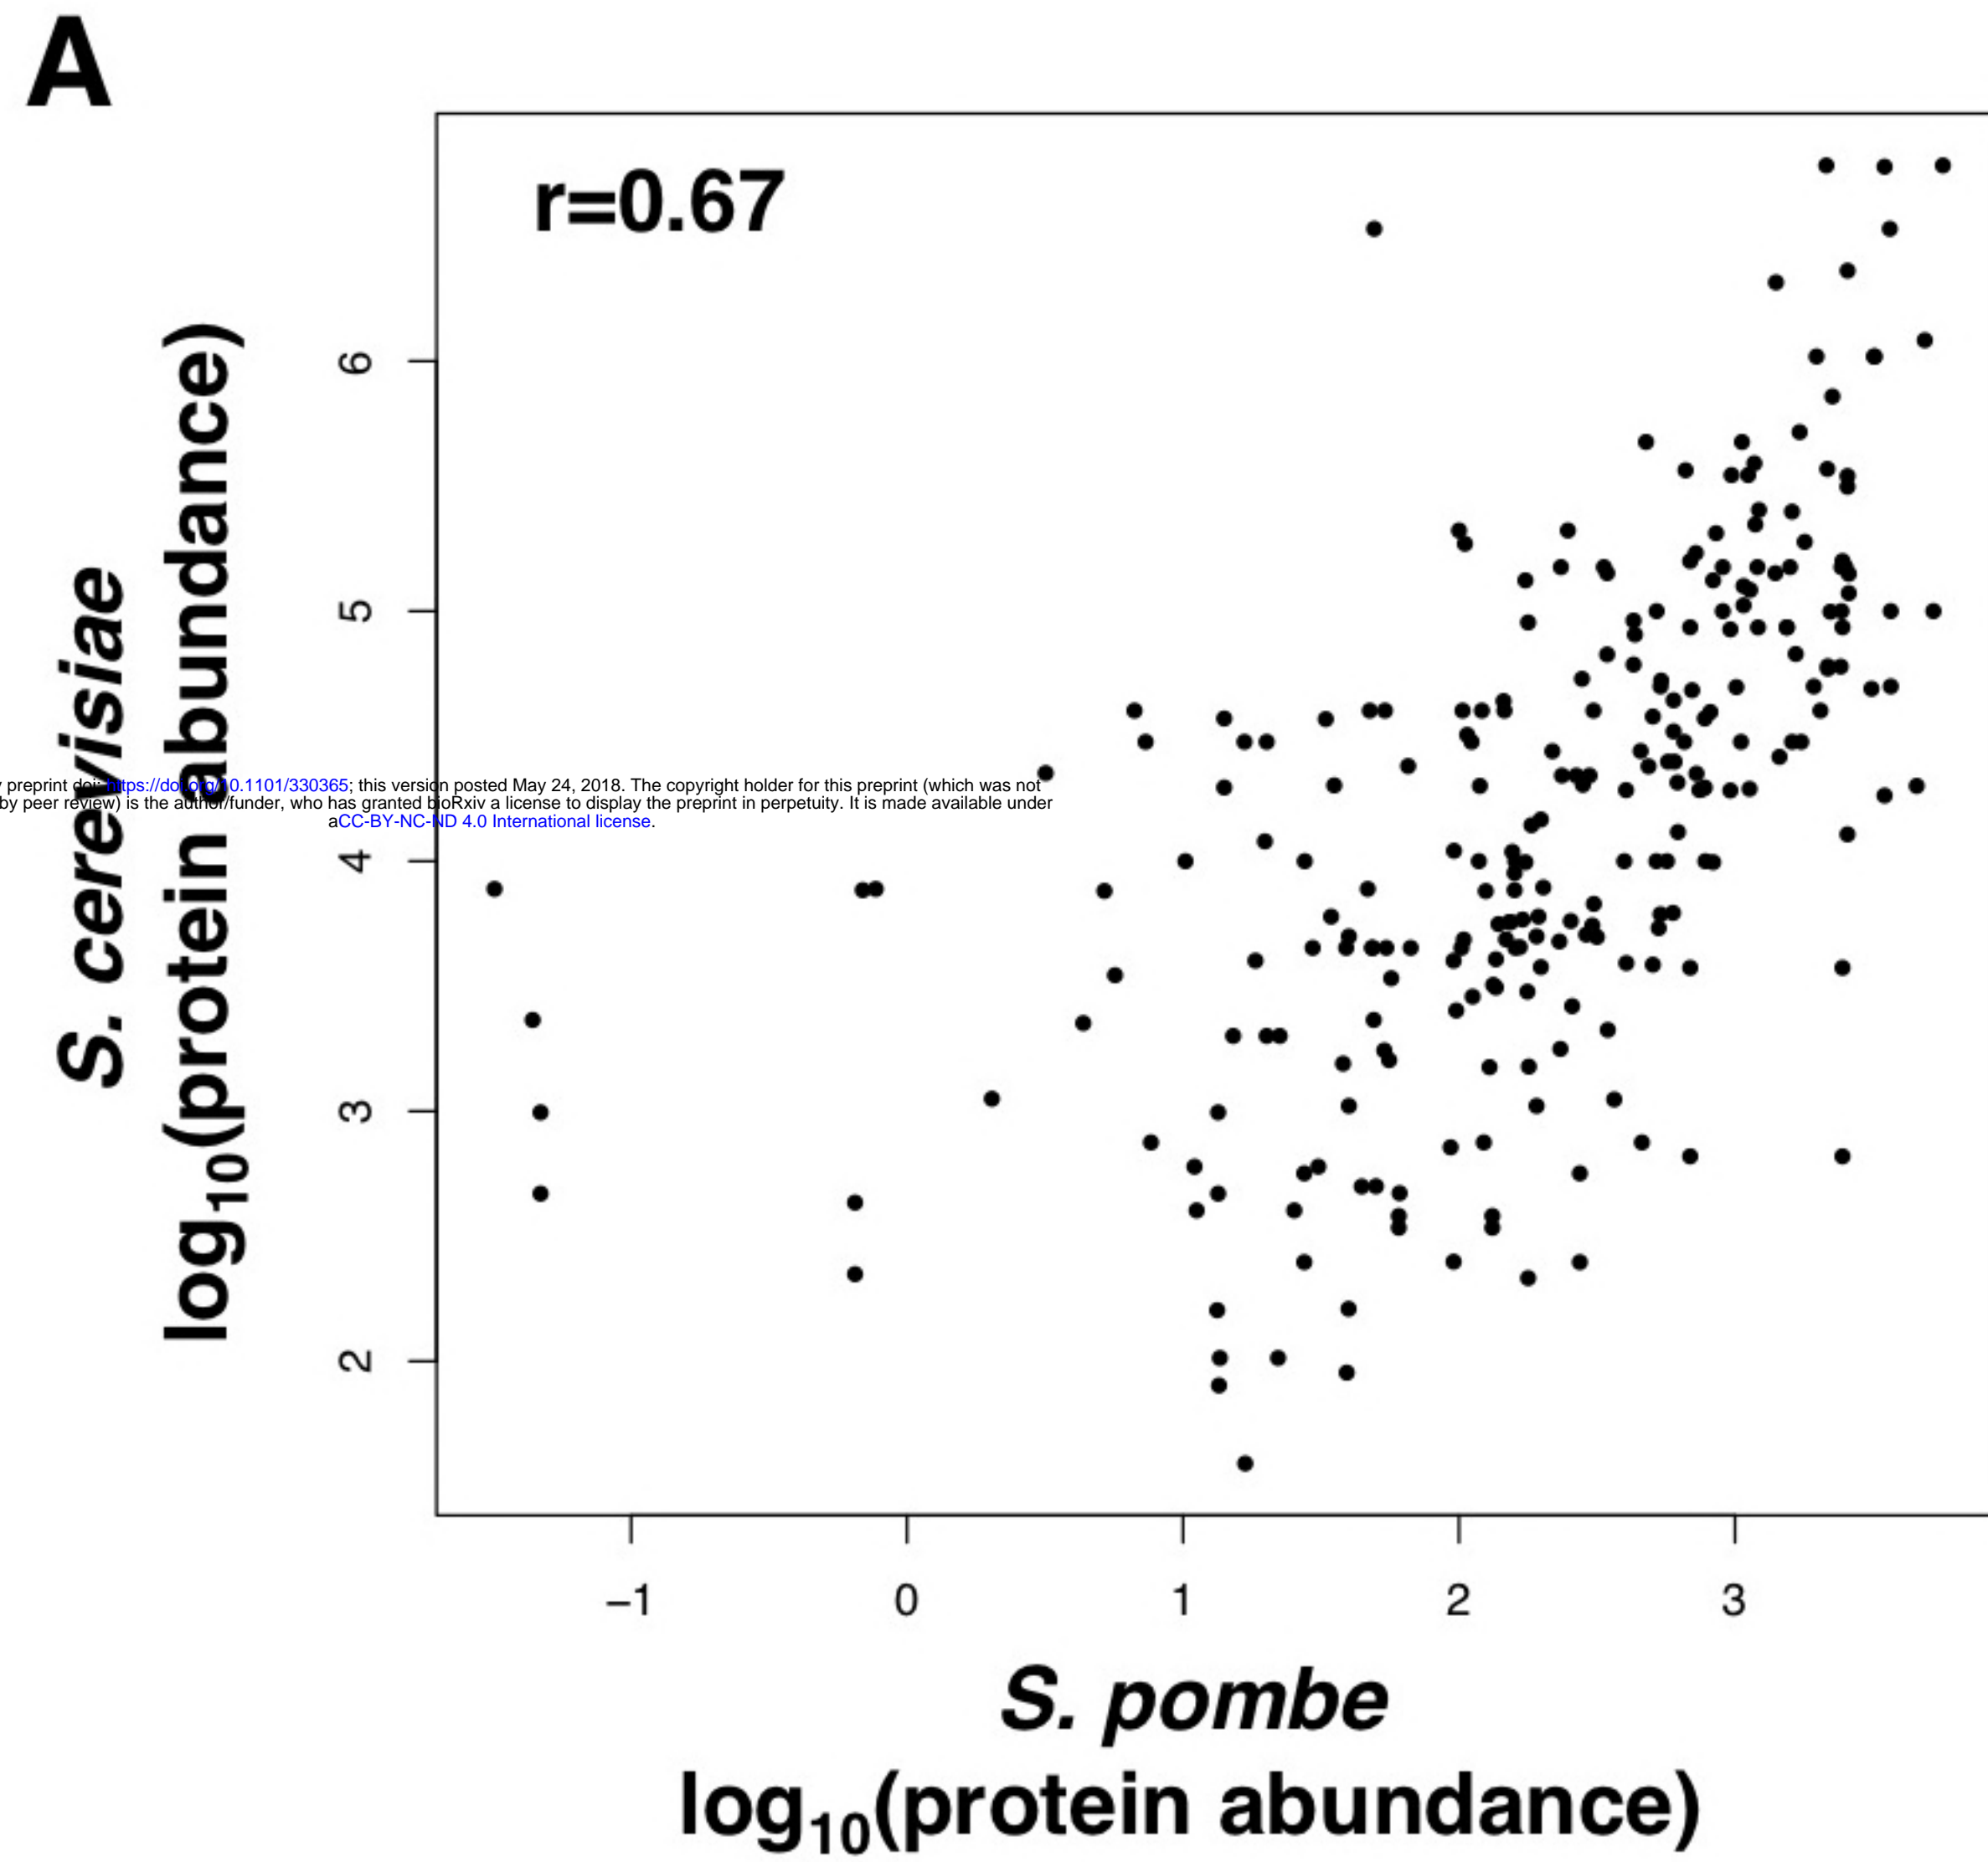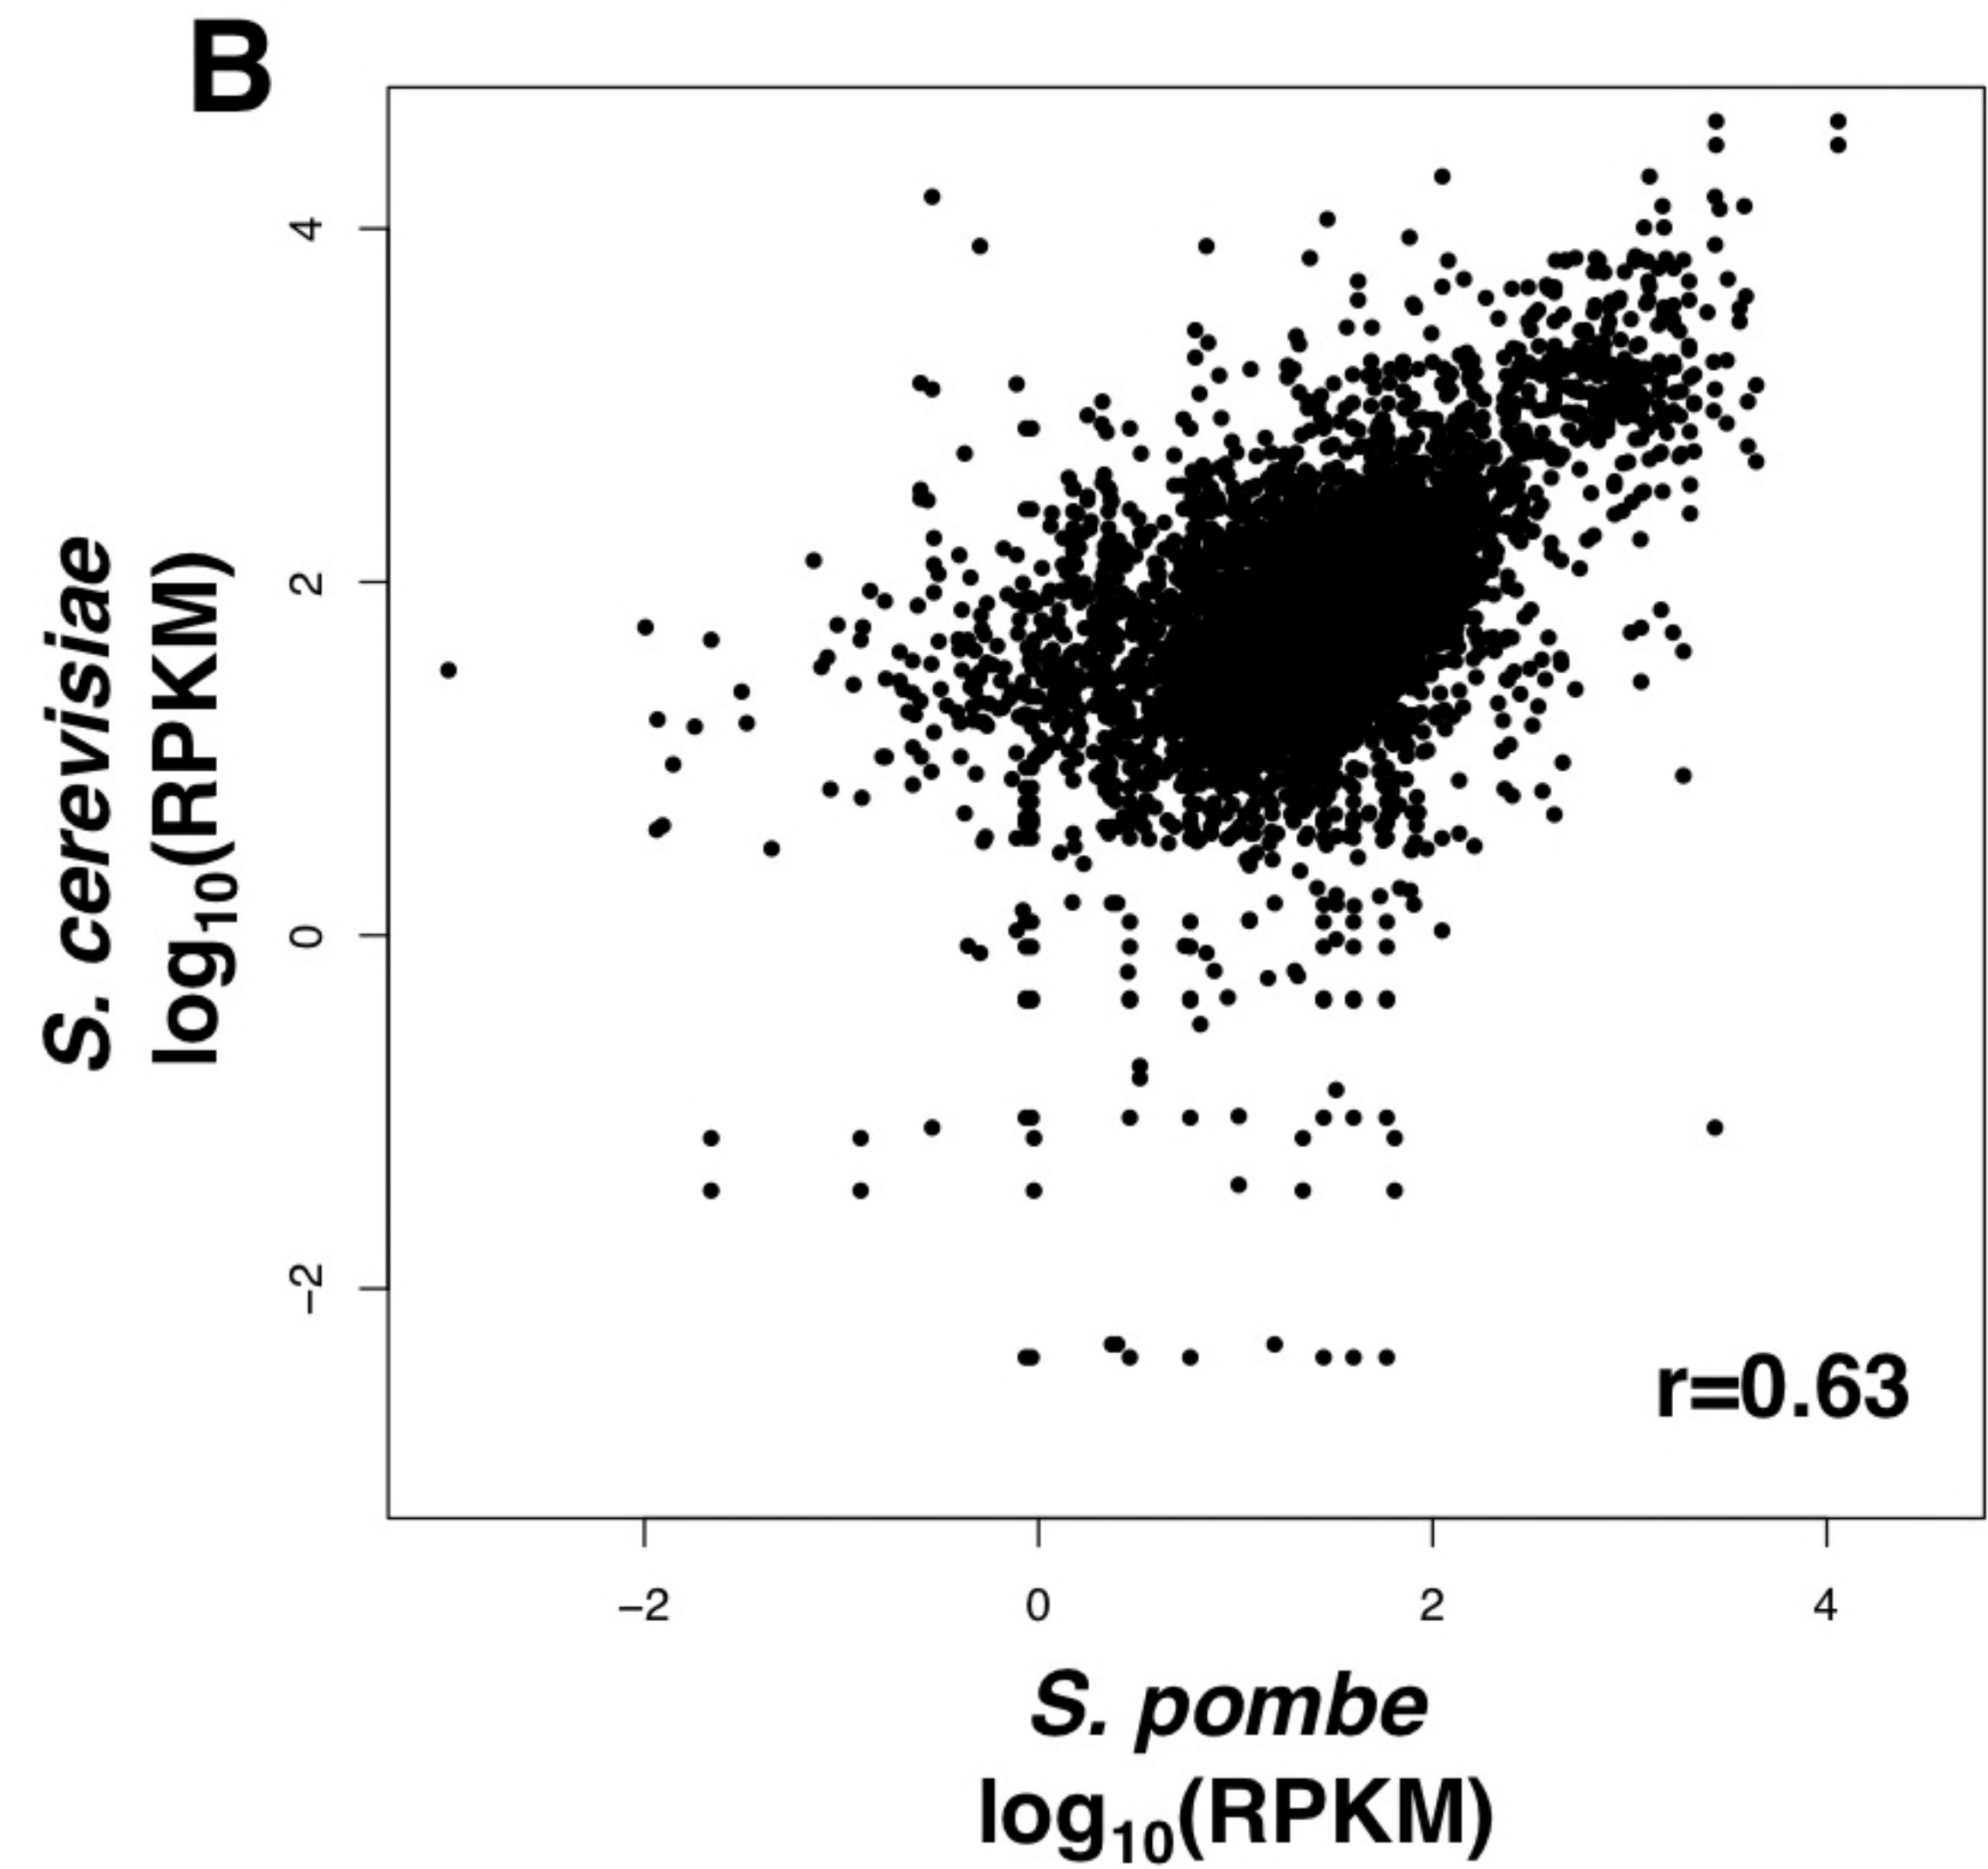

## A

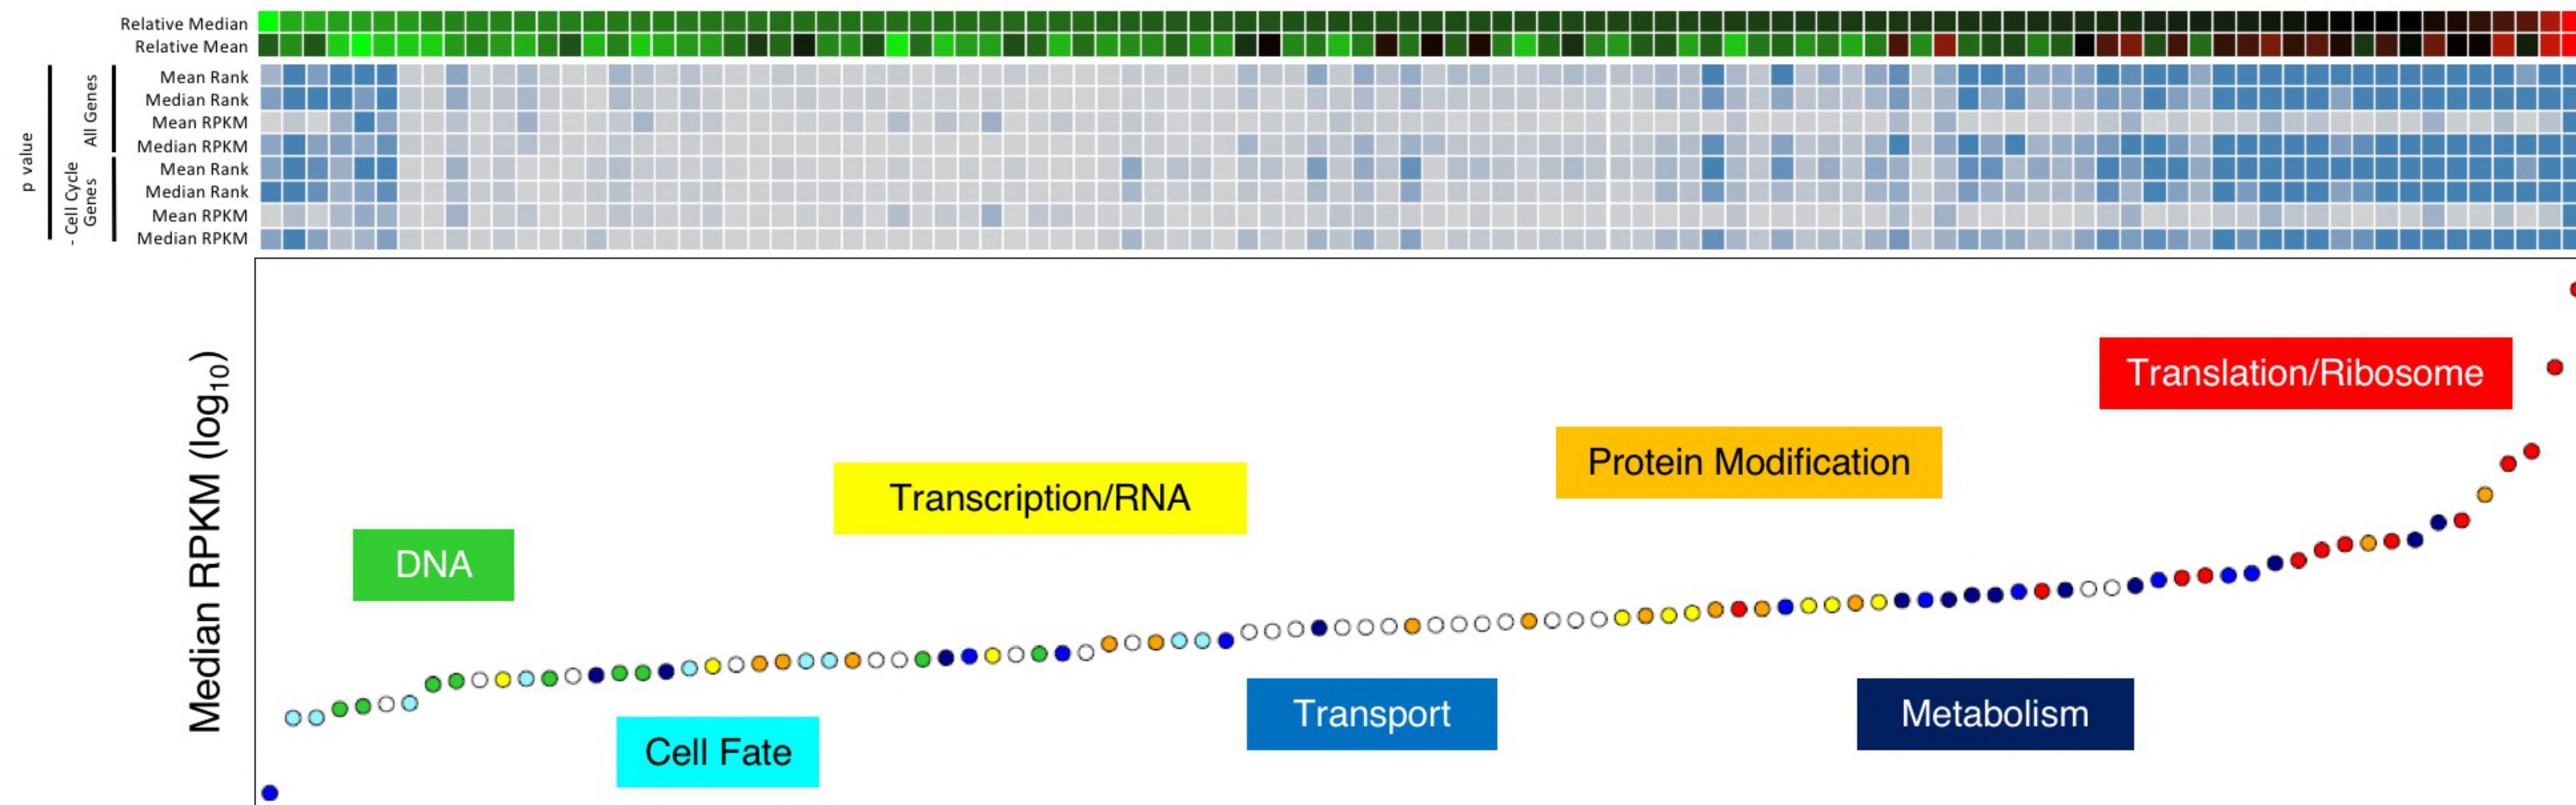

bioRxiv preprint doi: <https://doi.org/10.1101/330365>; this version posted May 24, 2018. The copyright holder for this preprint (which was not certified by peer review) is the author/funder, who has granted bioRxiv a license to display the preprint in perpetuity. It is made available under aCC-BY-NC-ND 4.0 International license.

GO Biological Process

## B

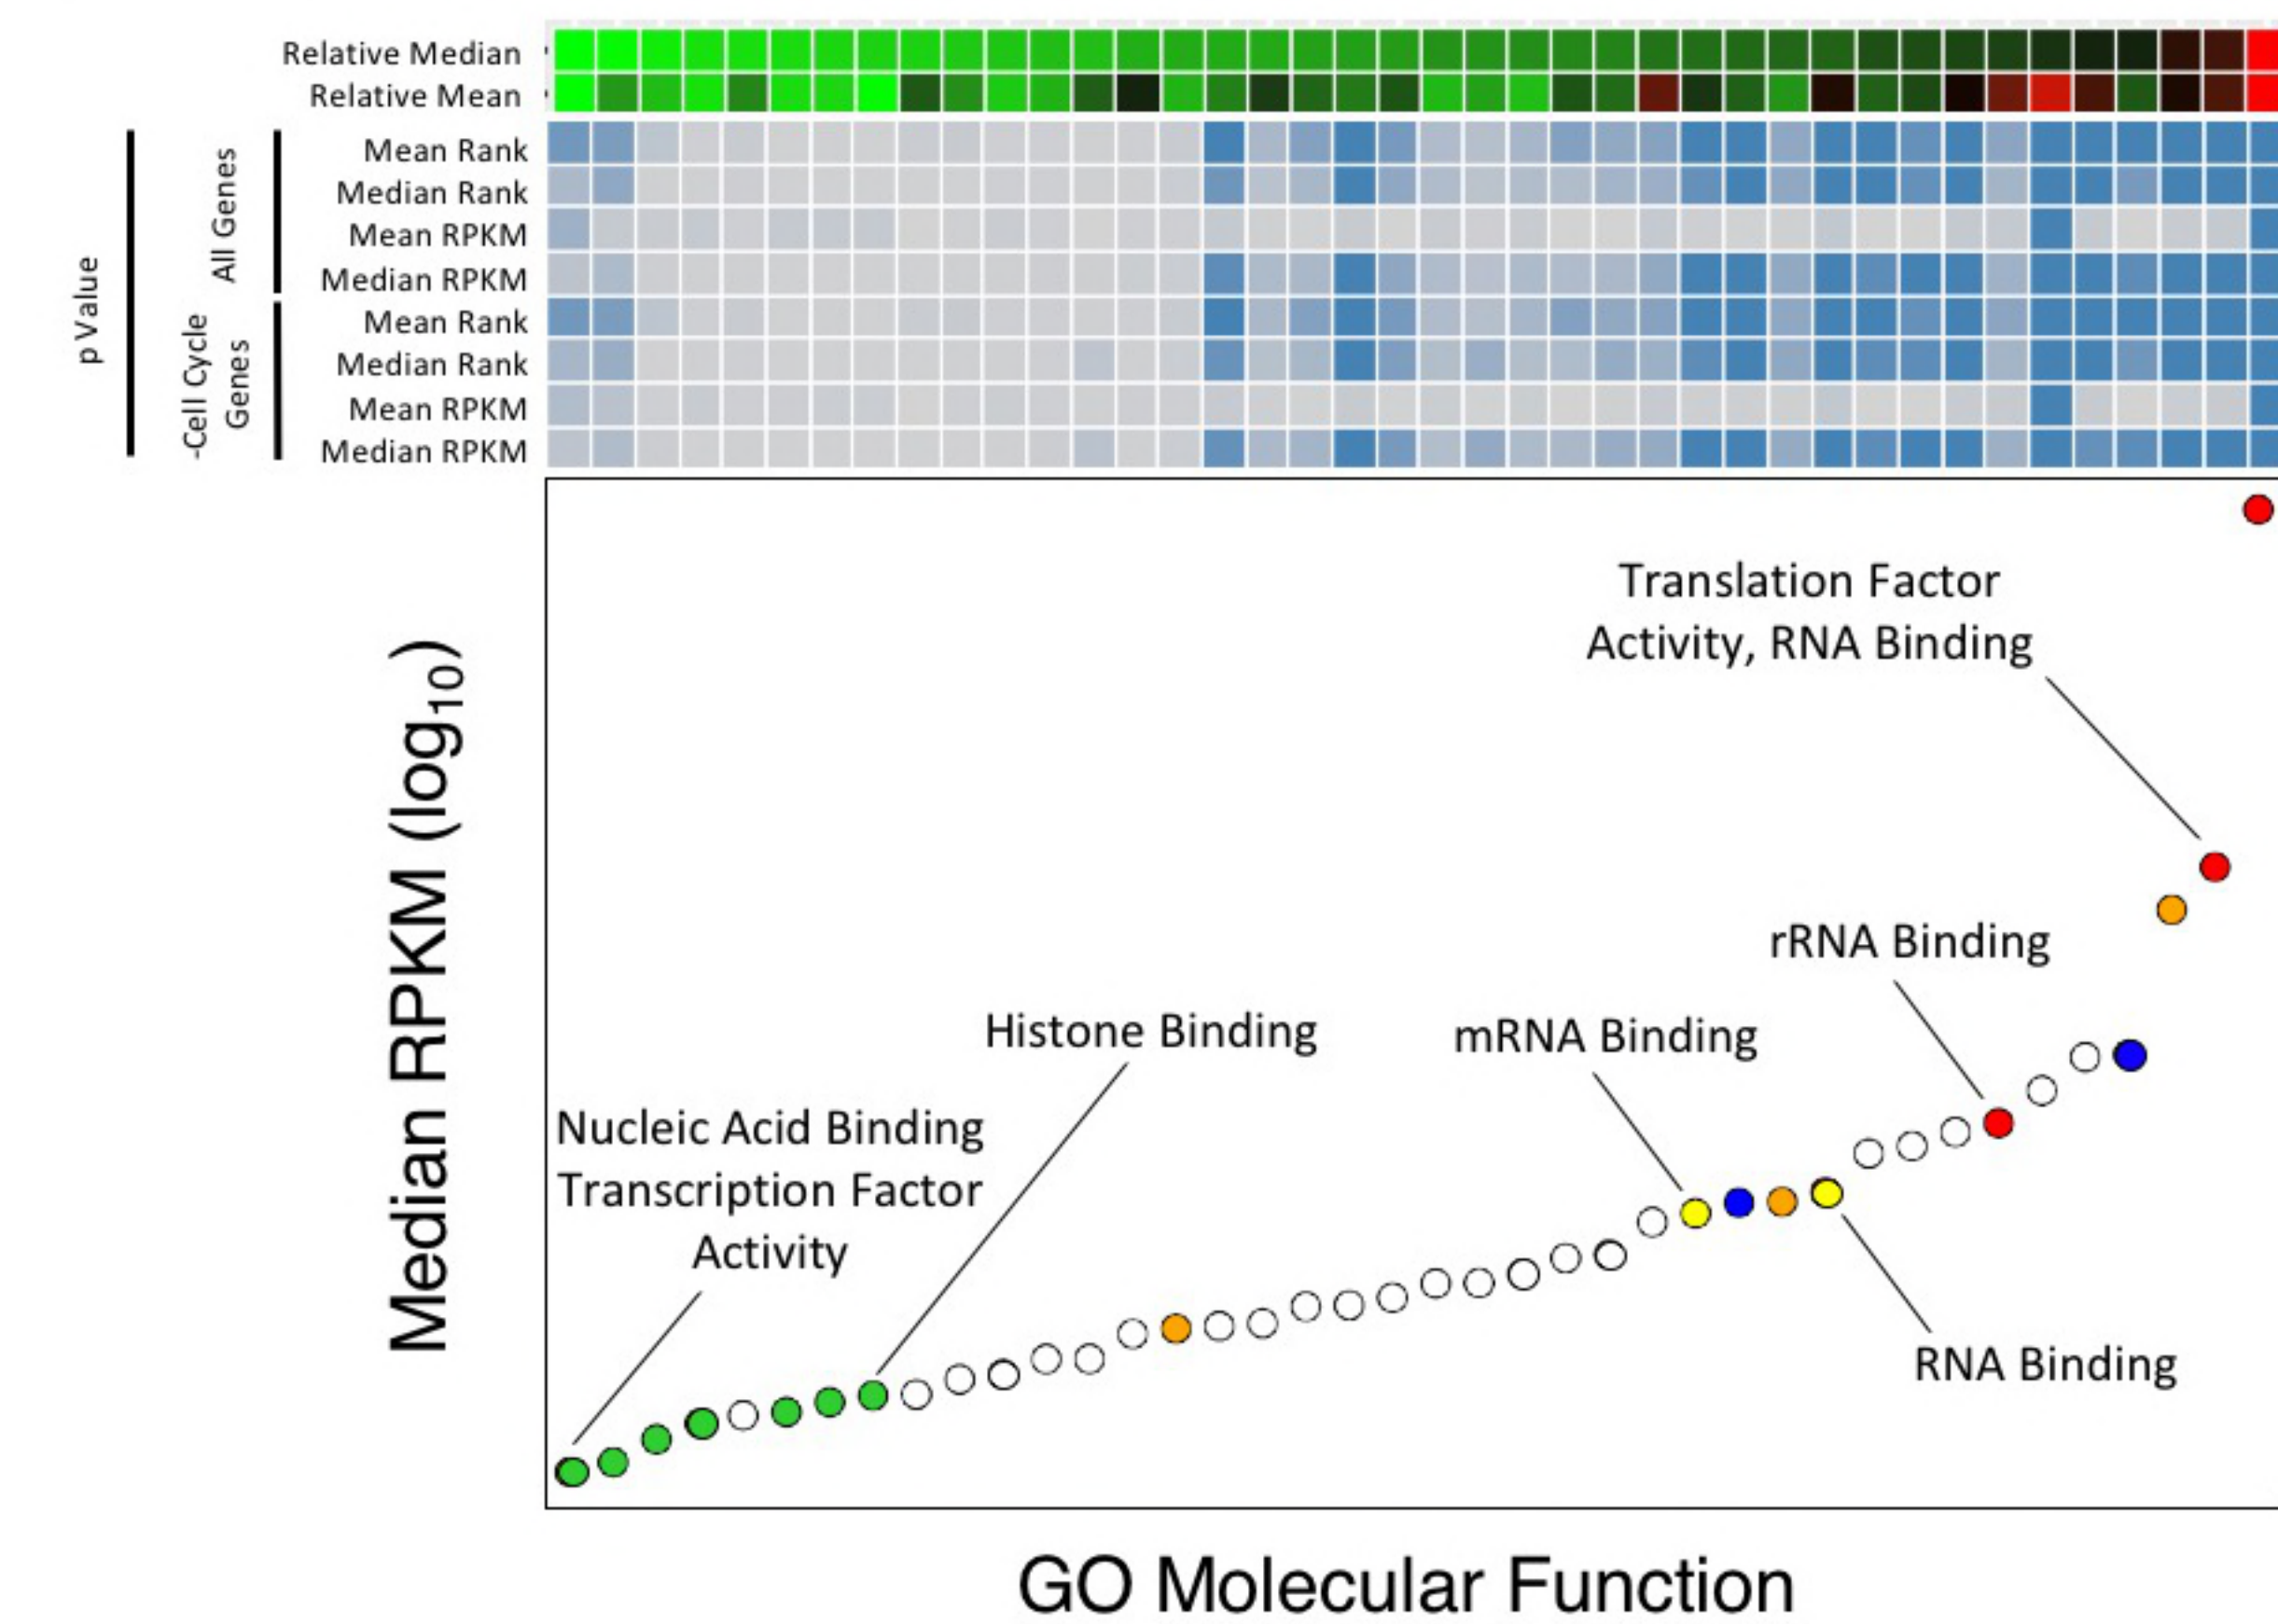

GO Molecular Function

## C

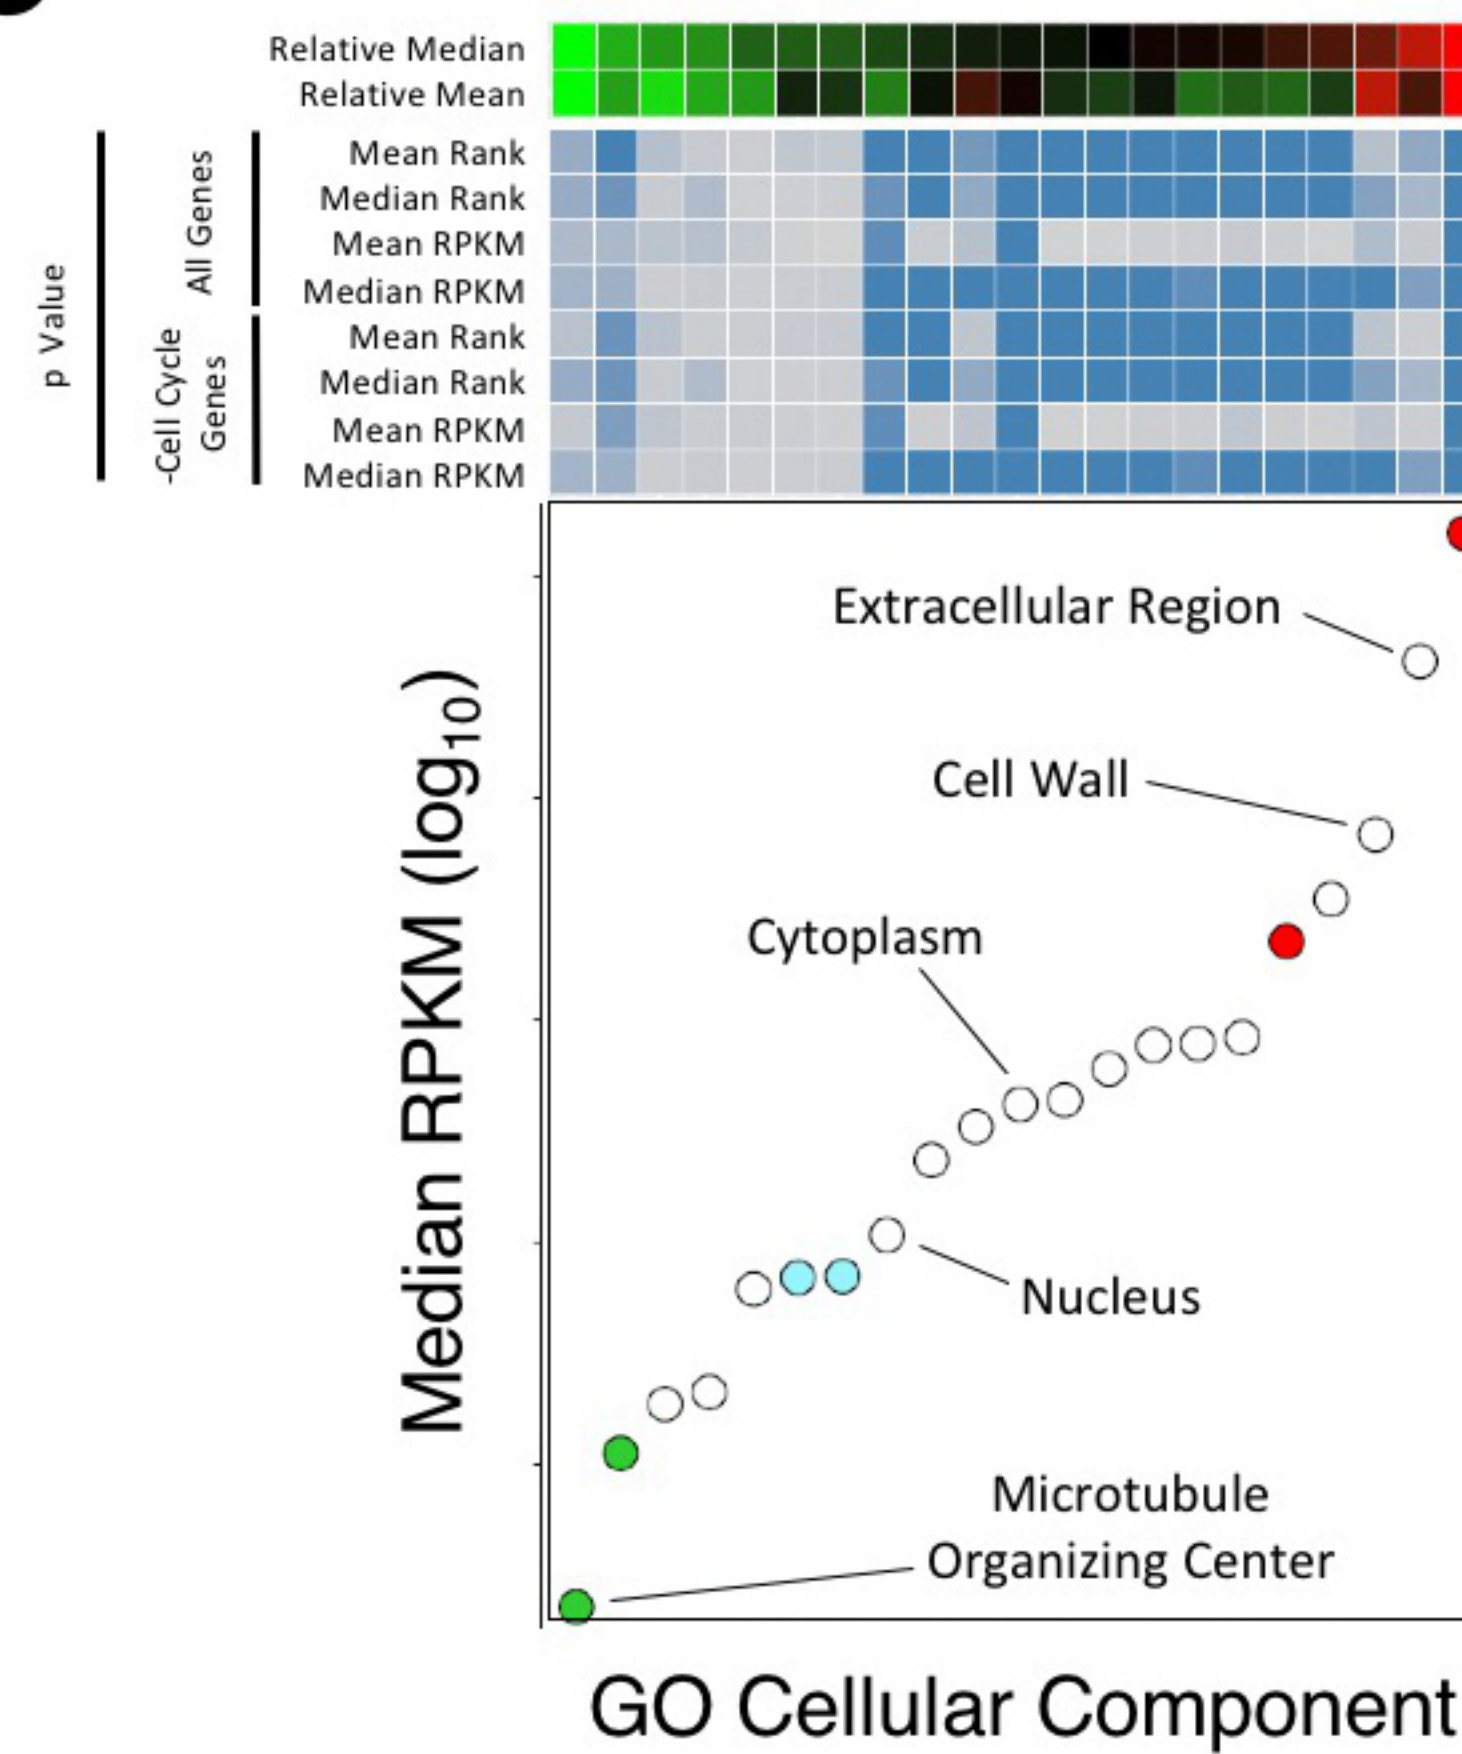

GO Cellular Component

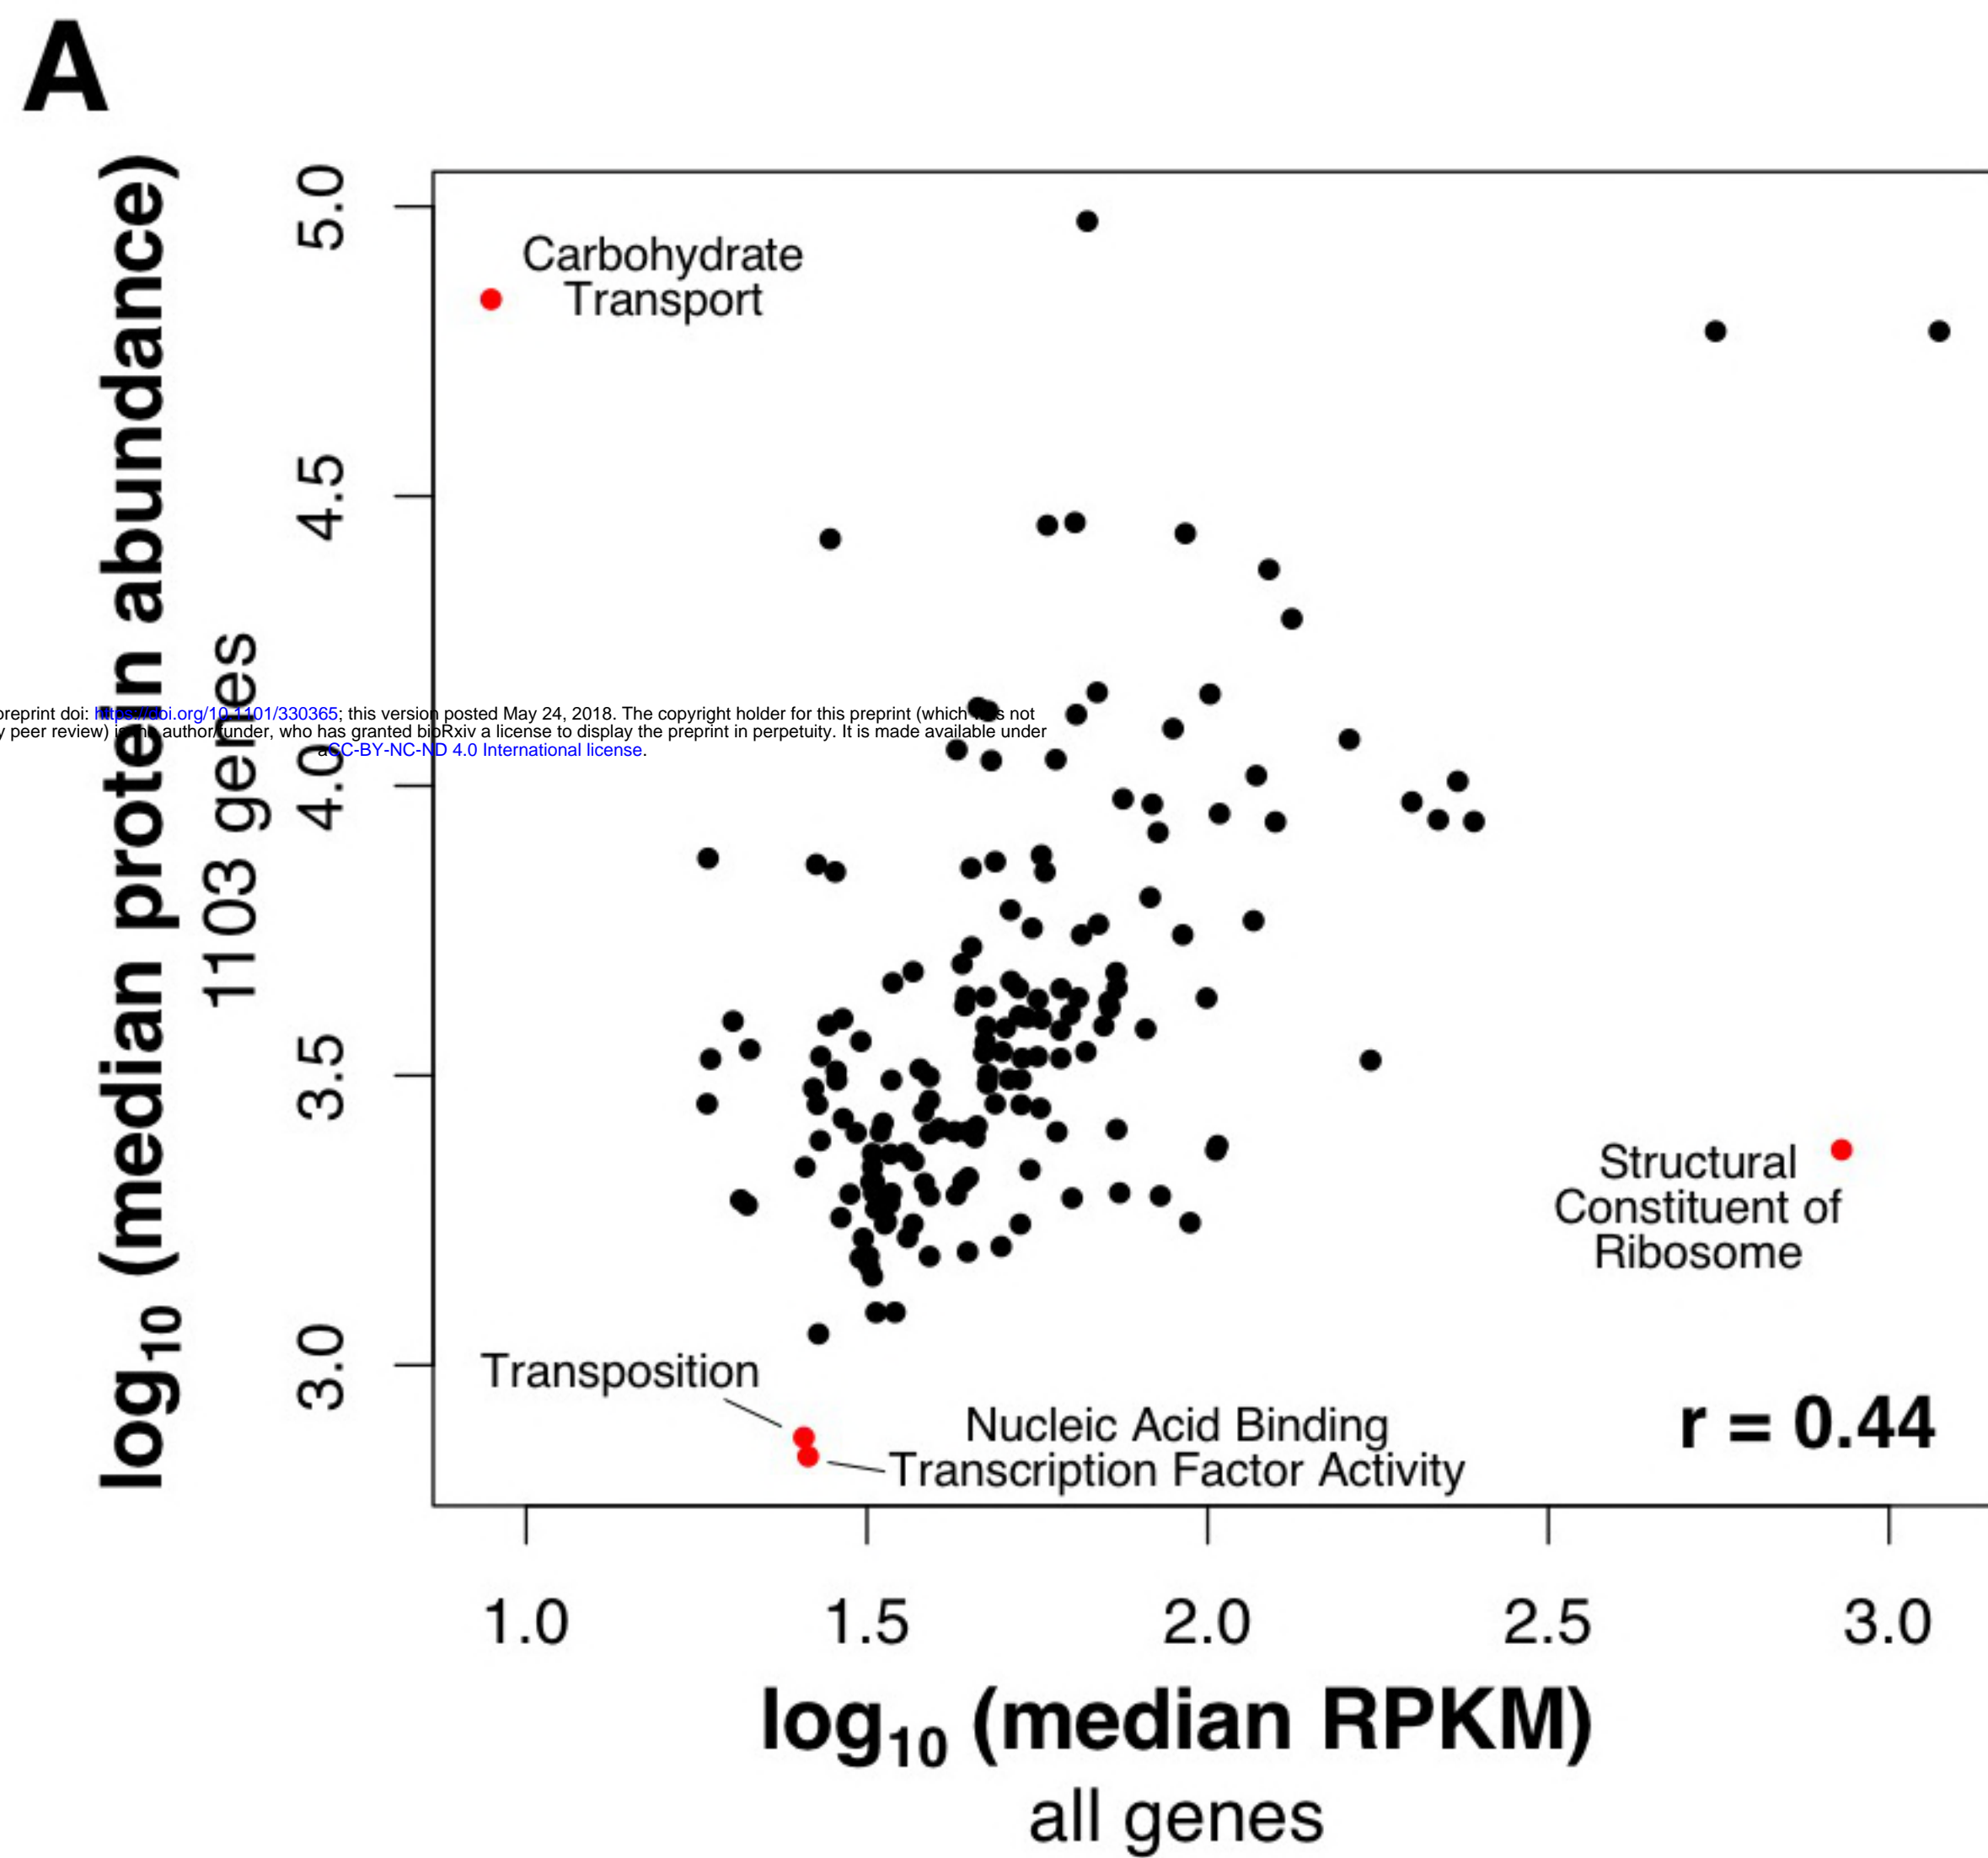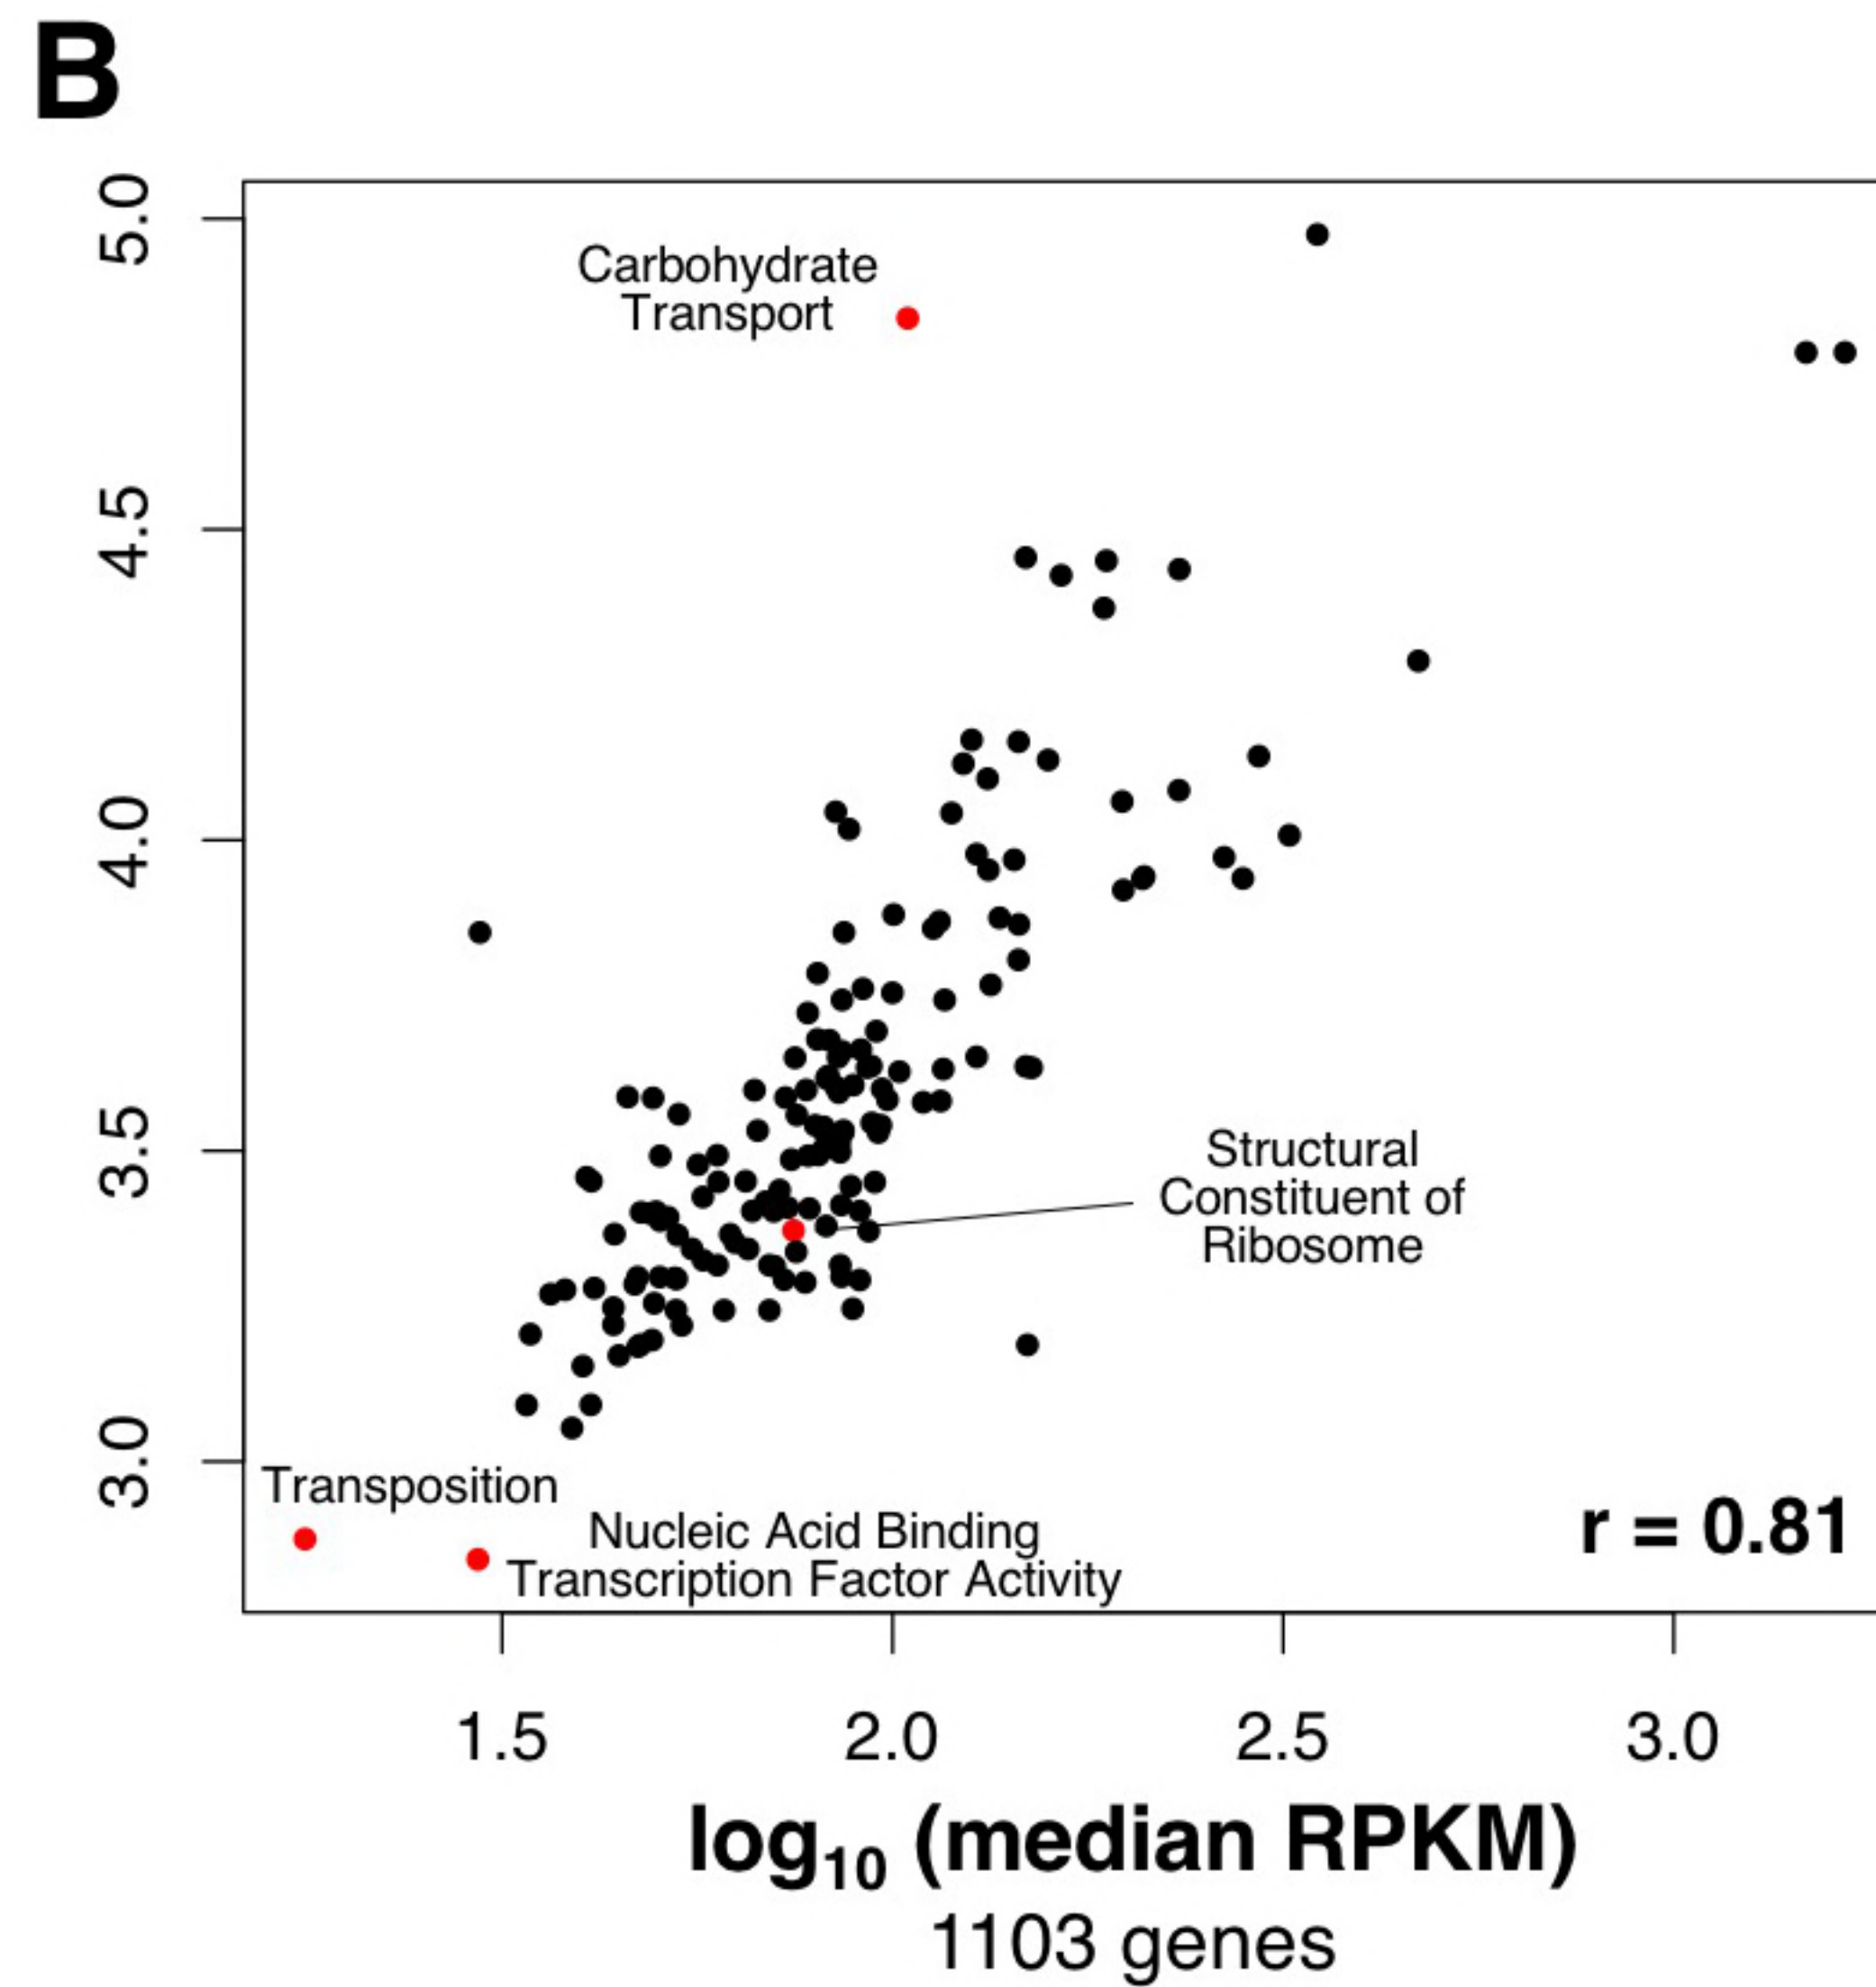

**A**

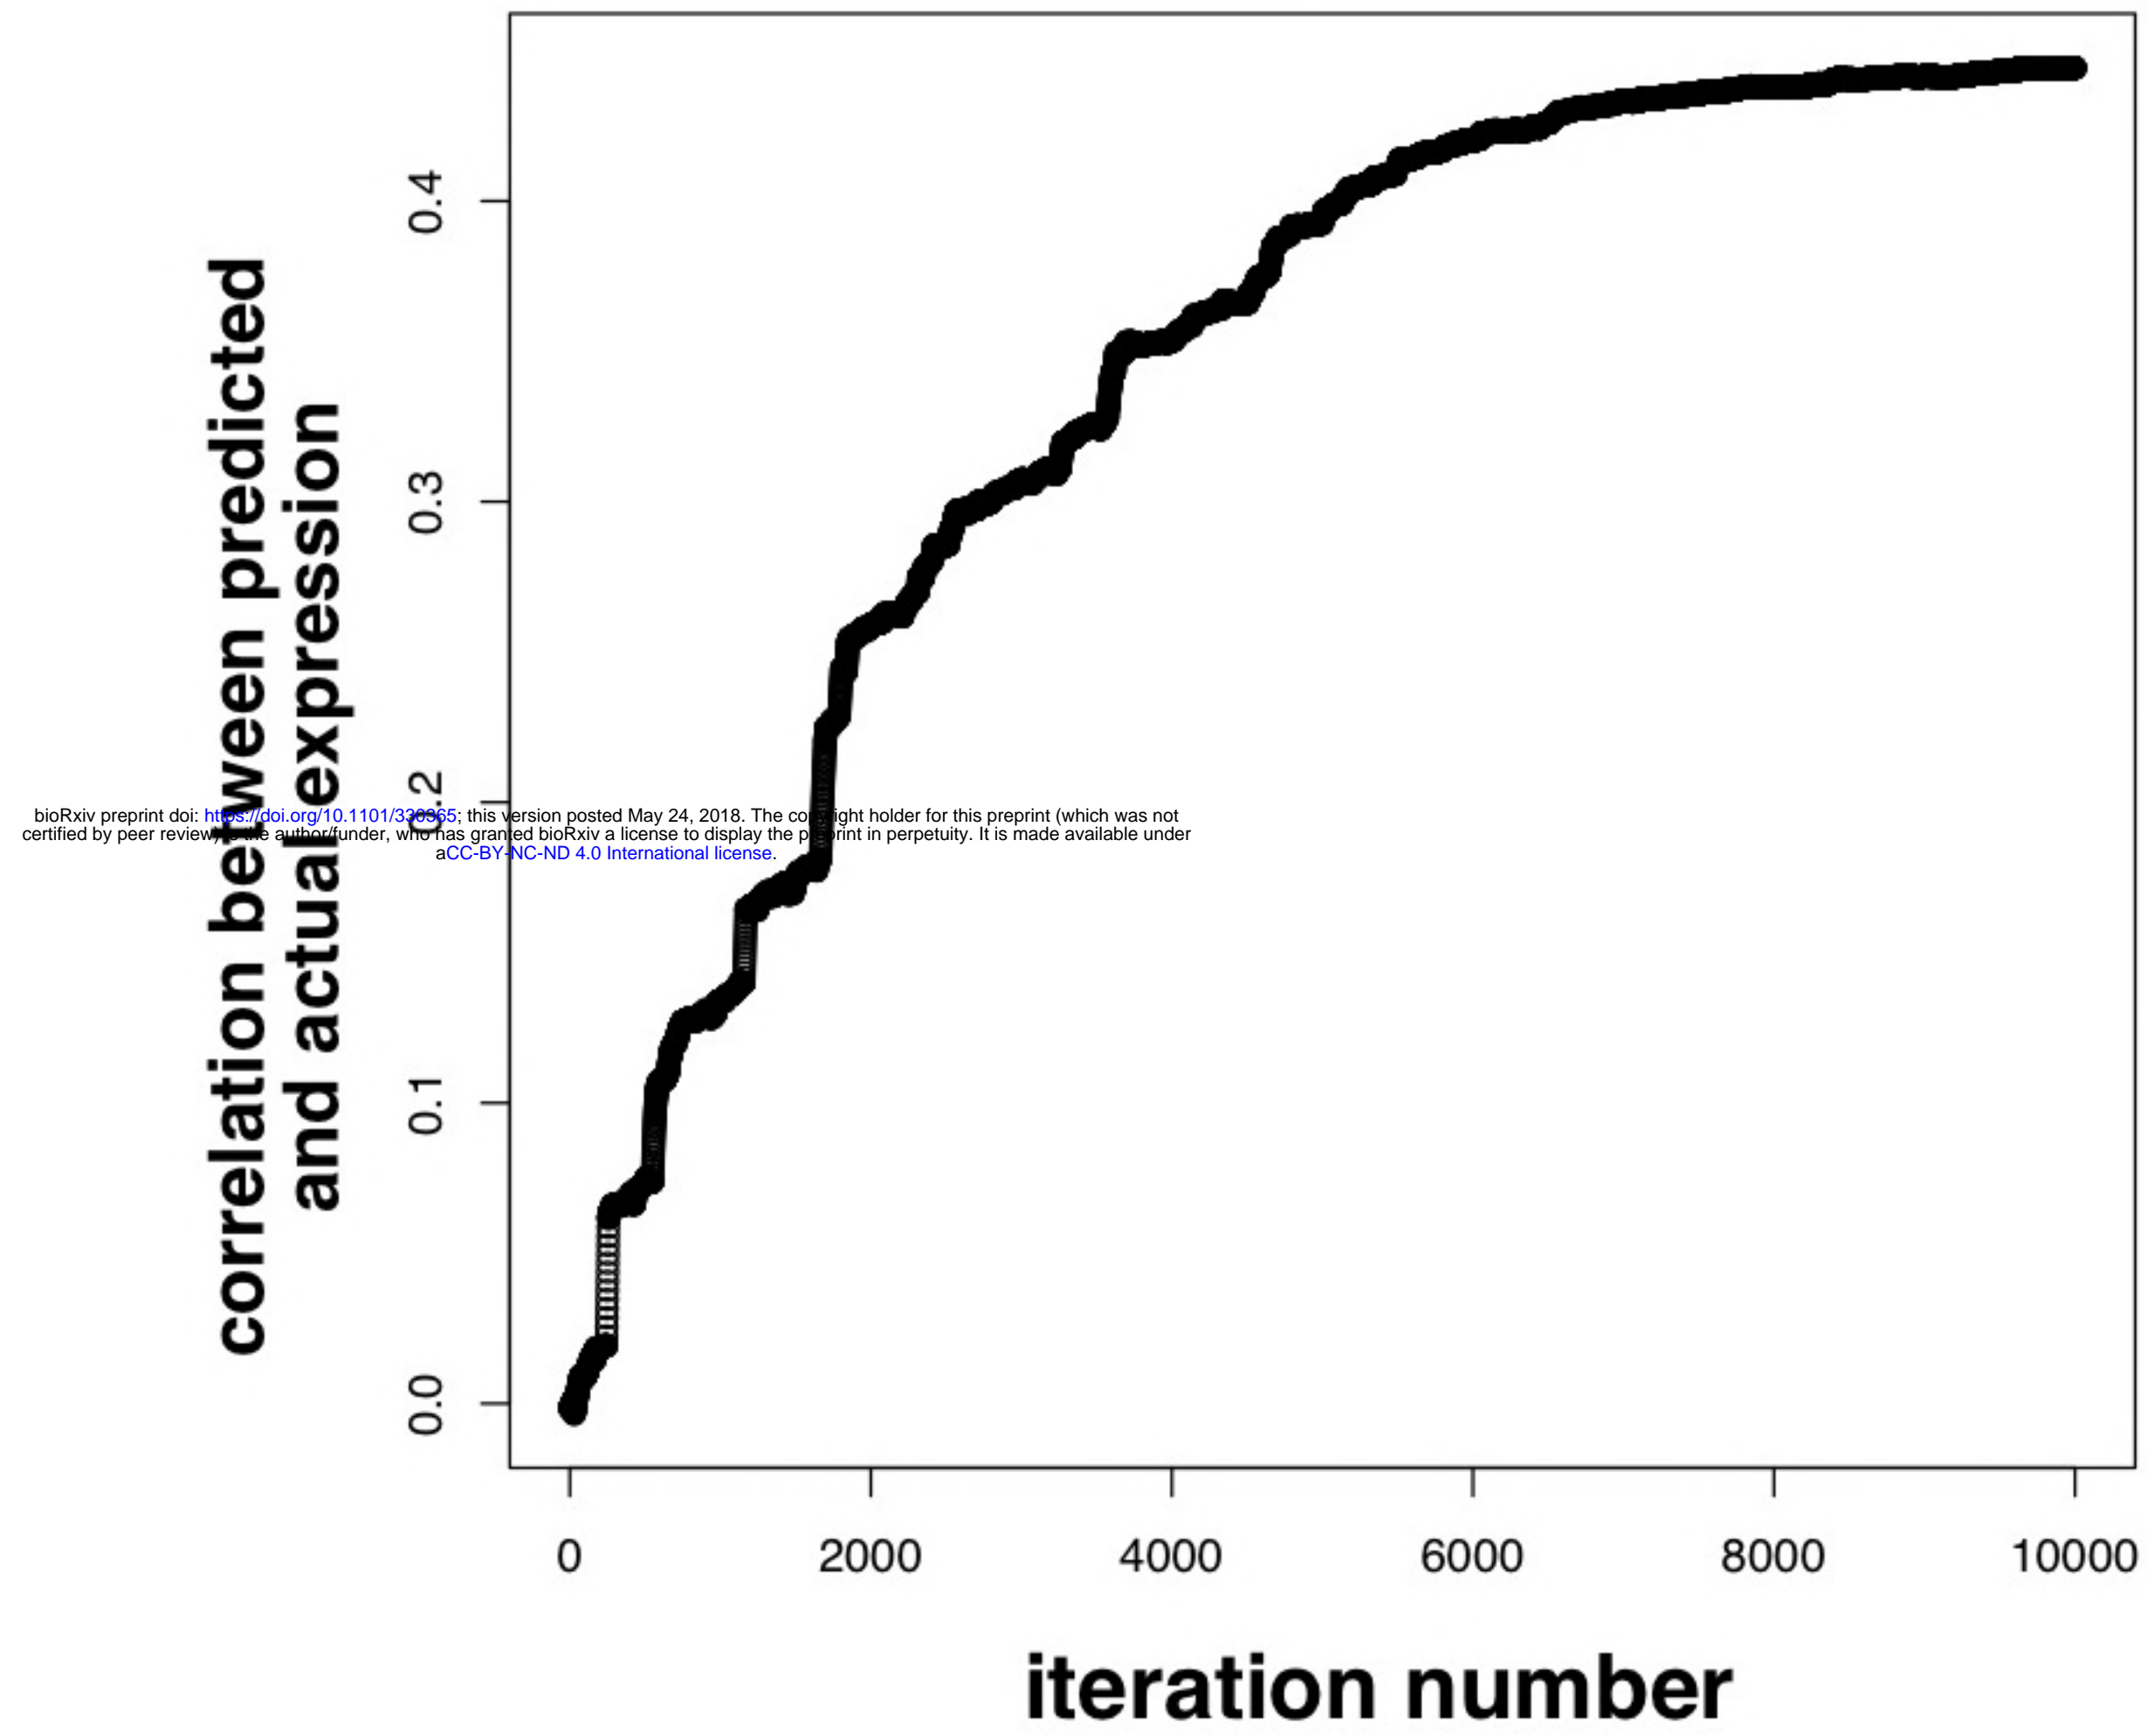

**B**

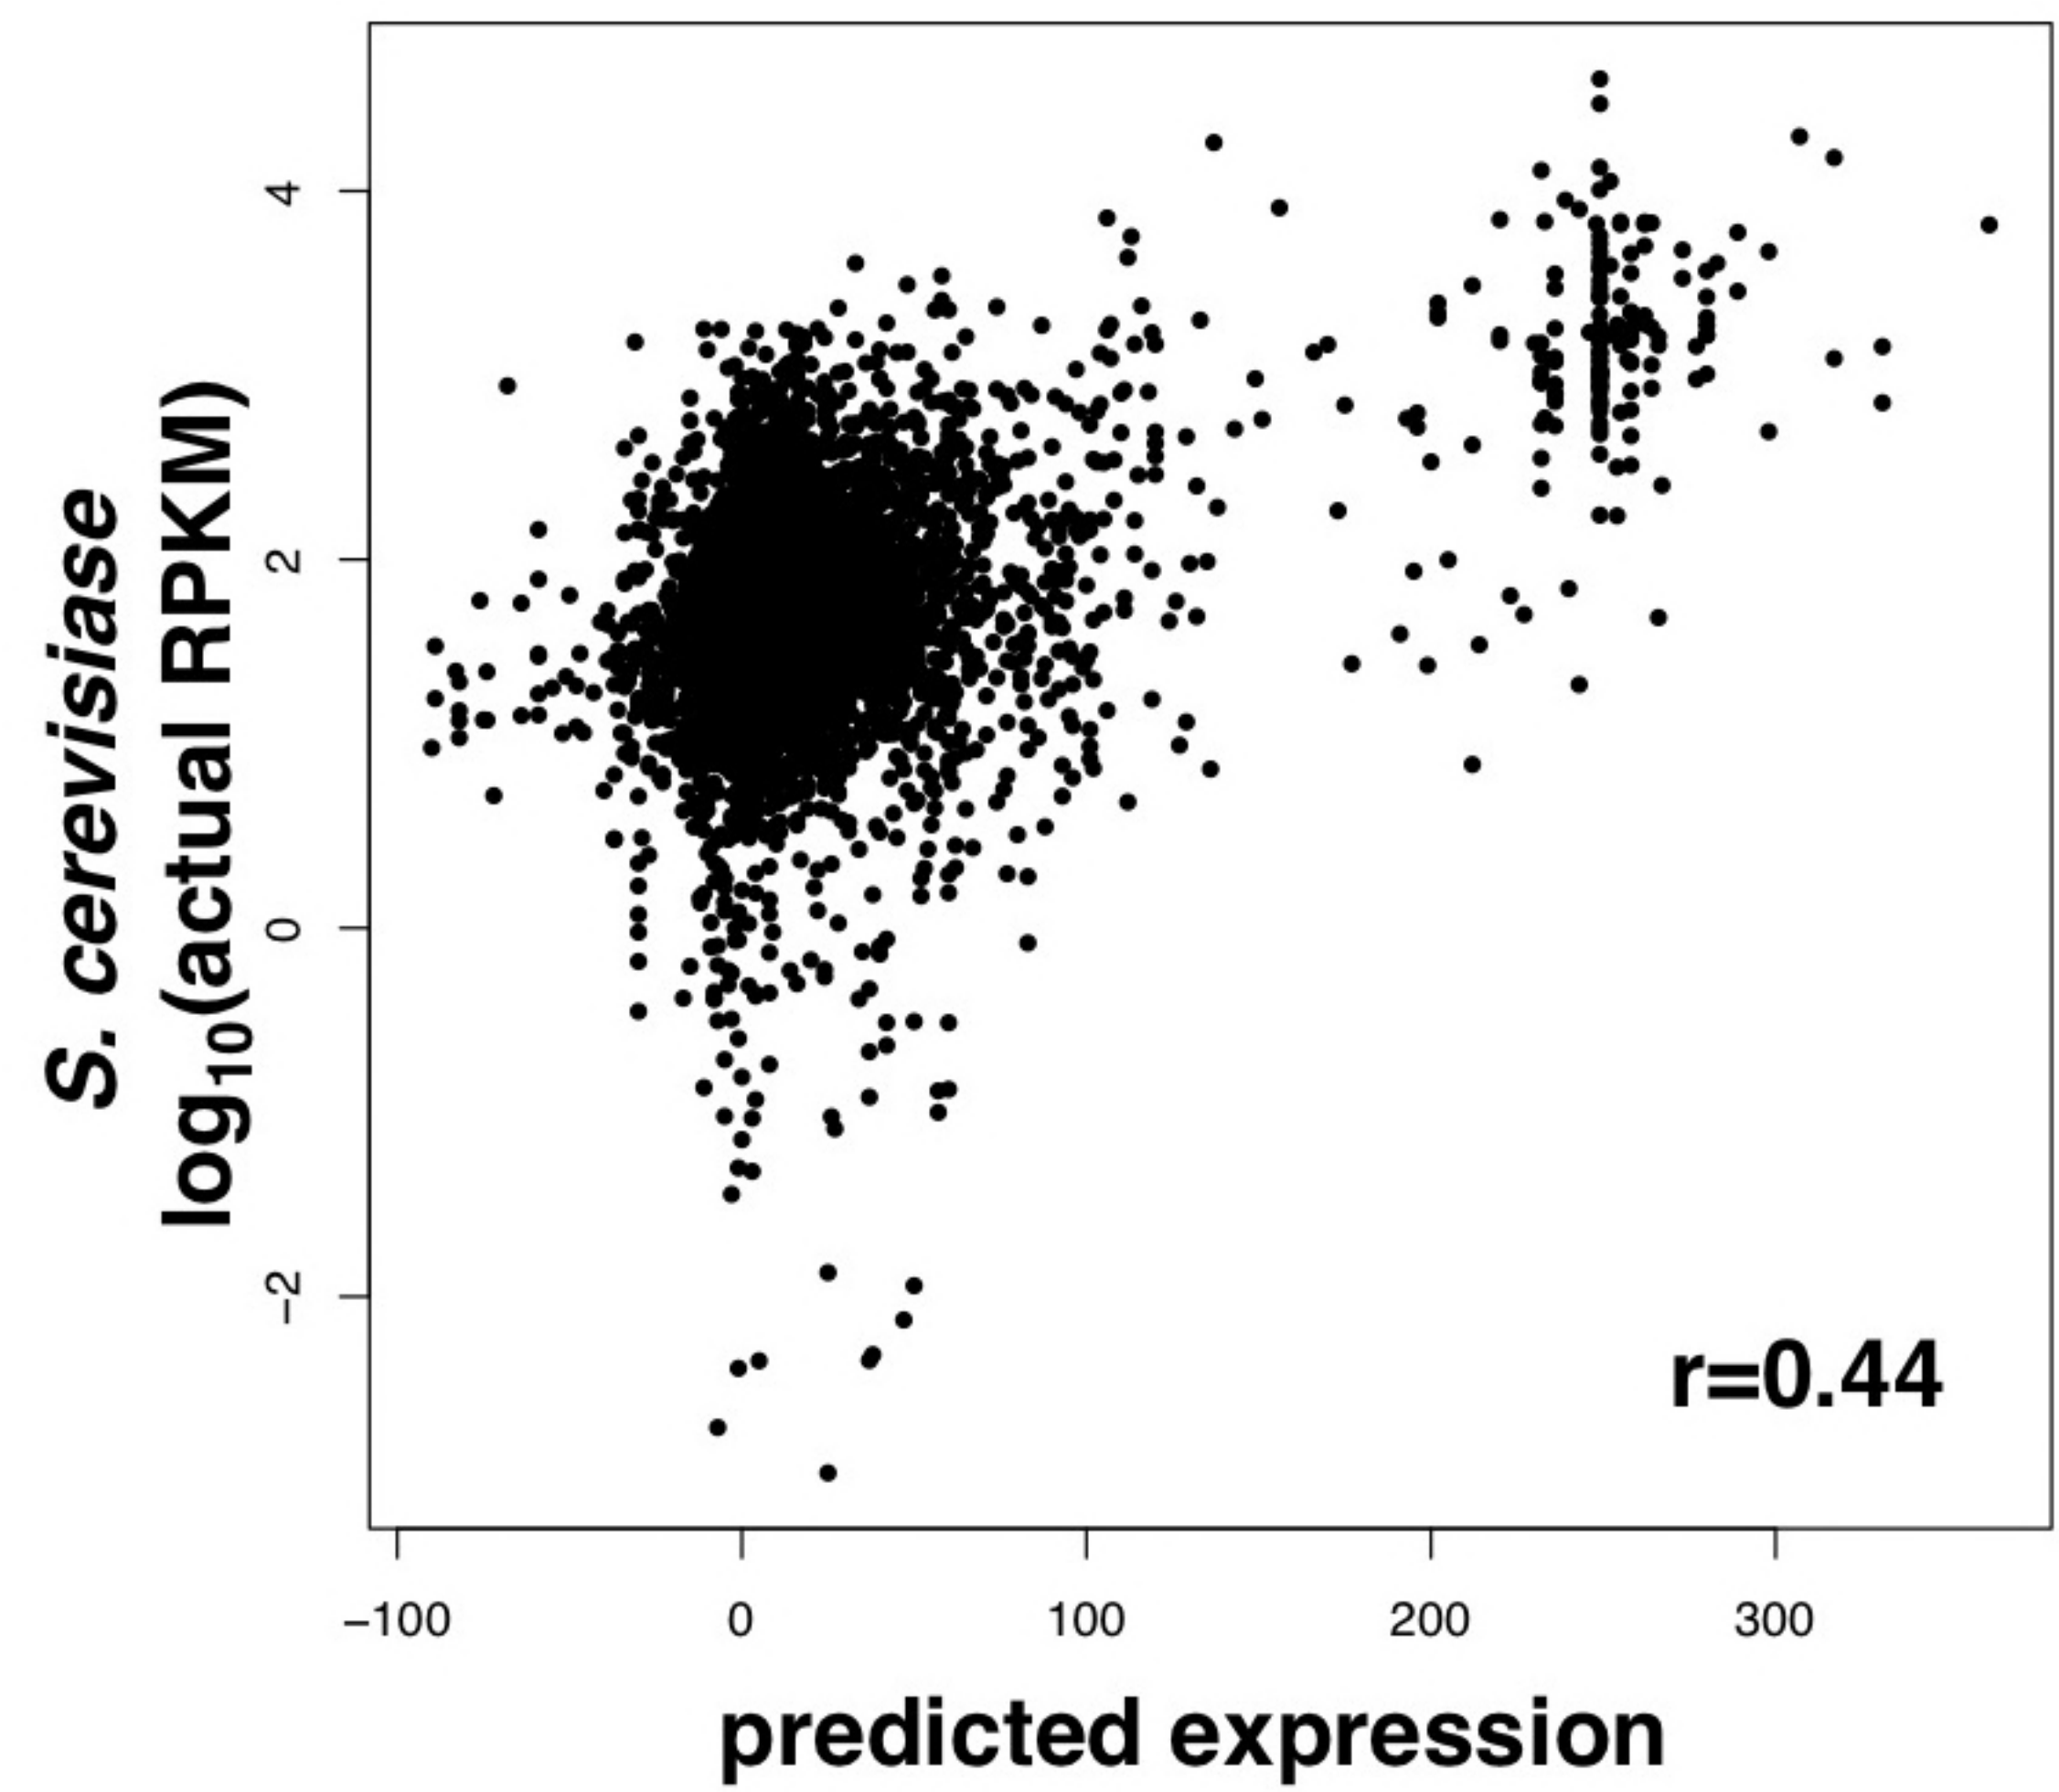



**FIGURE 5**

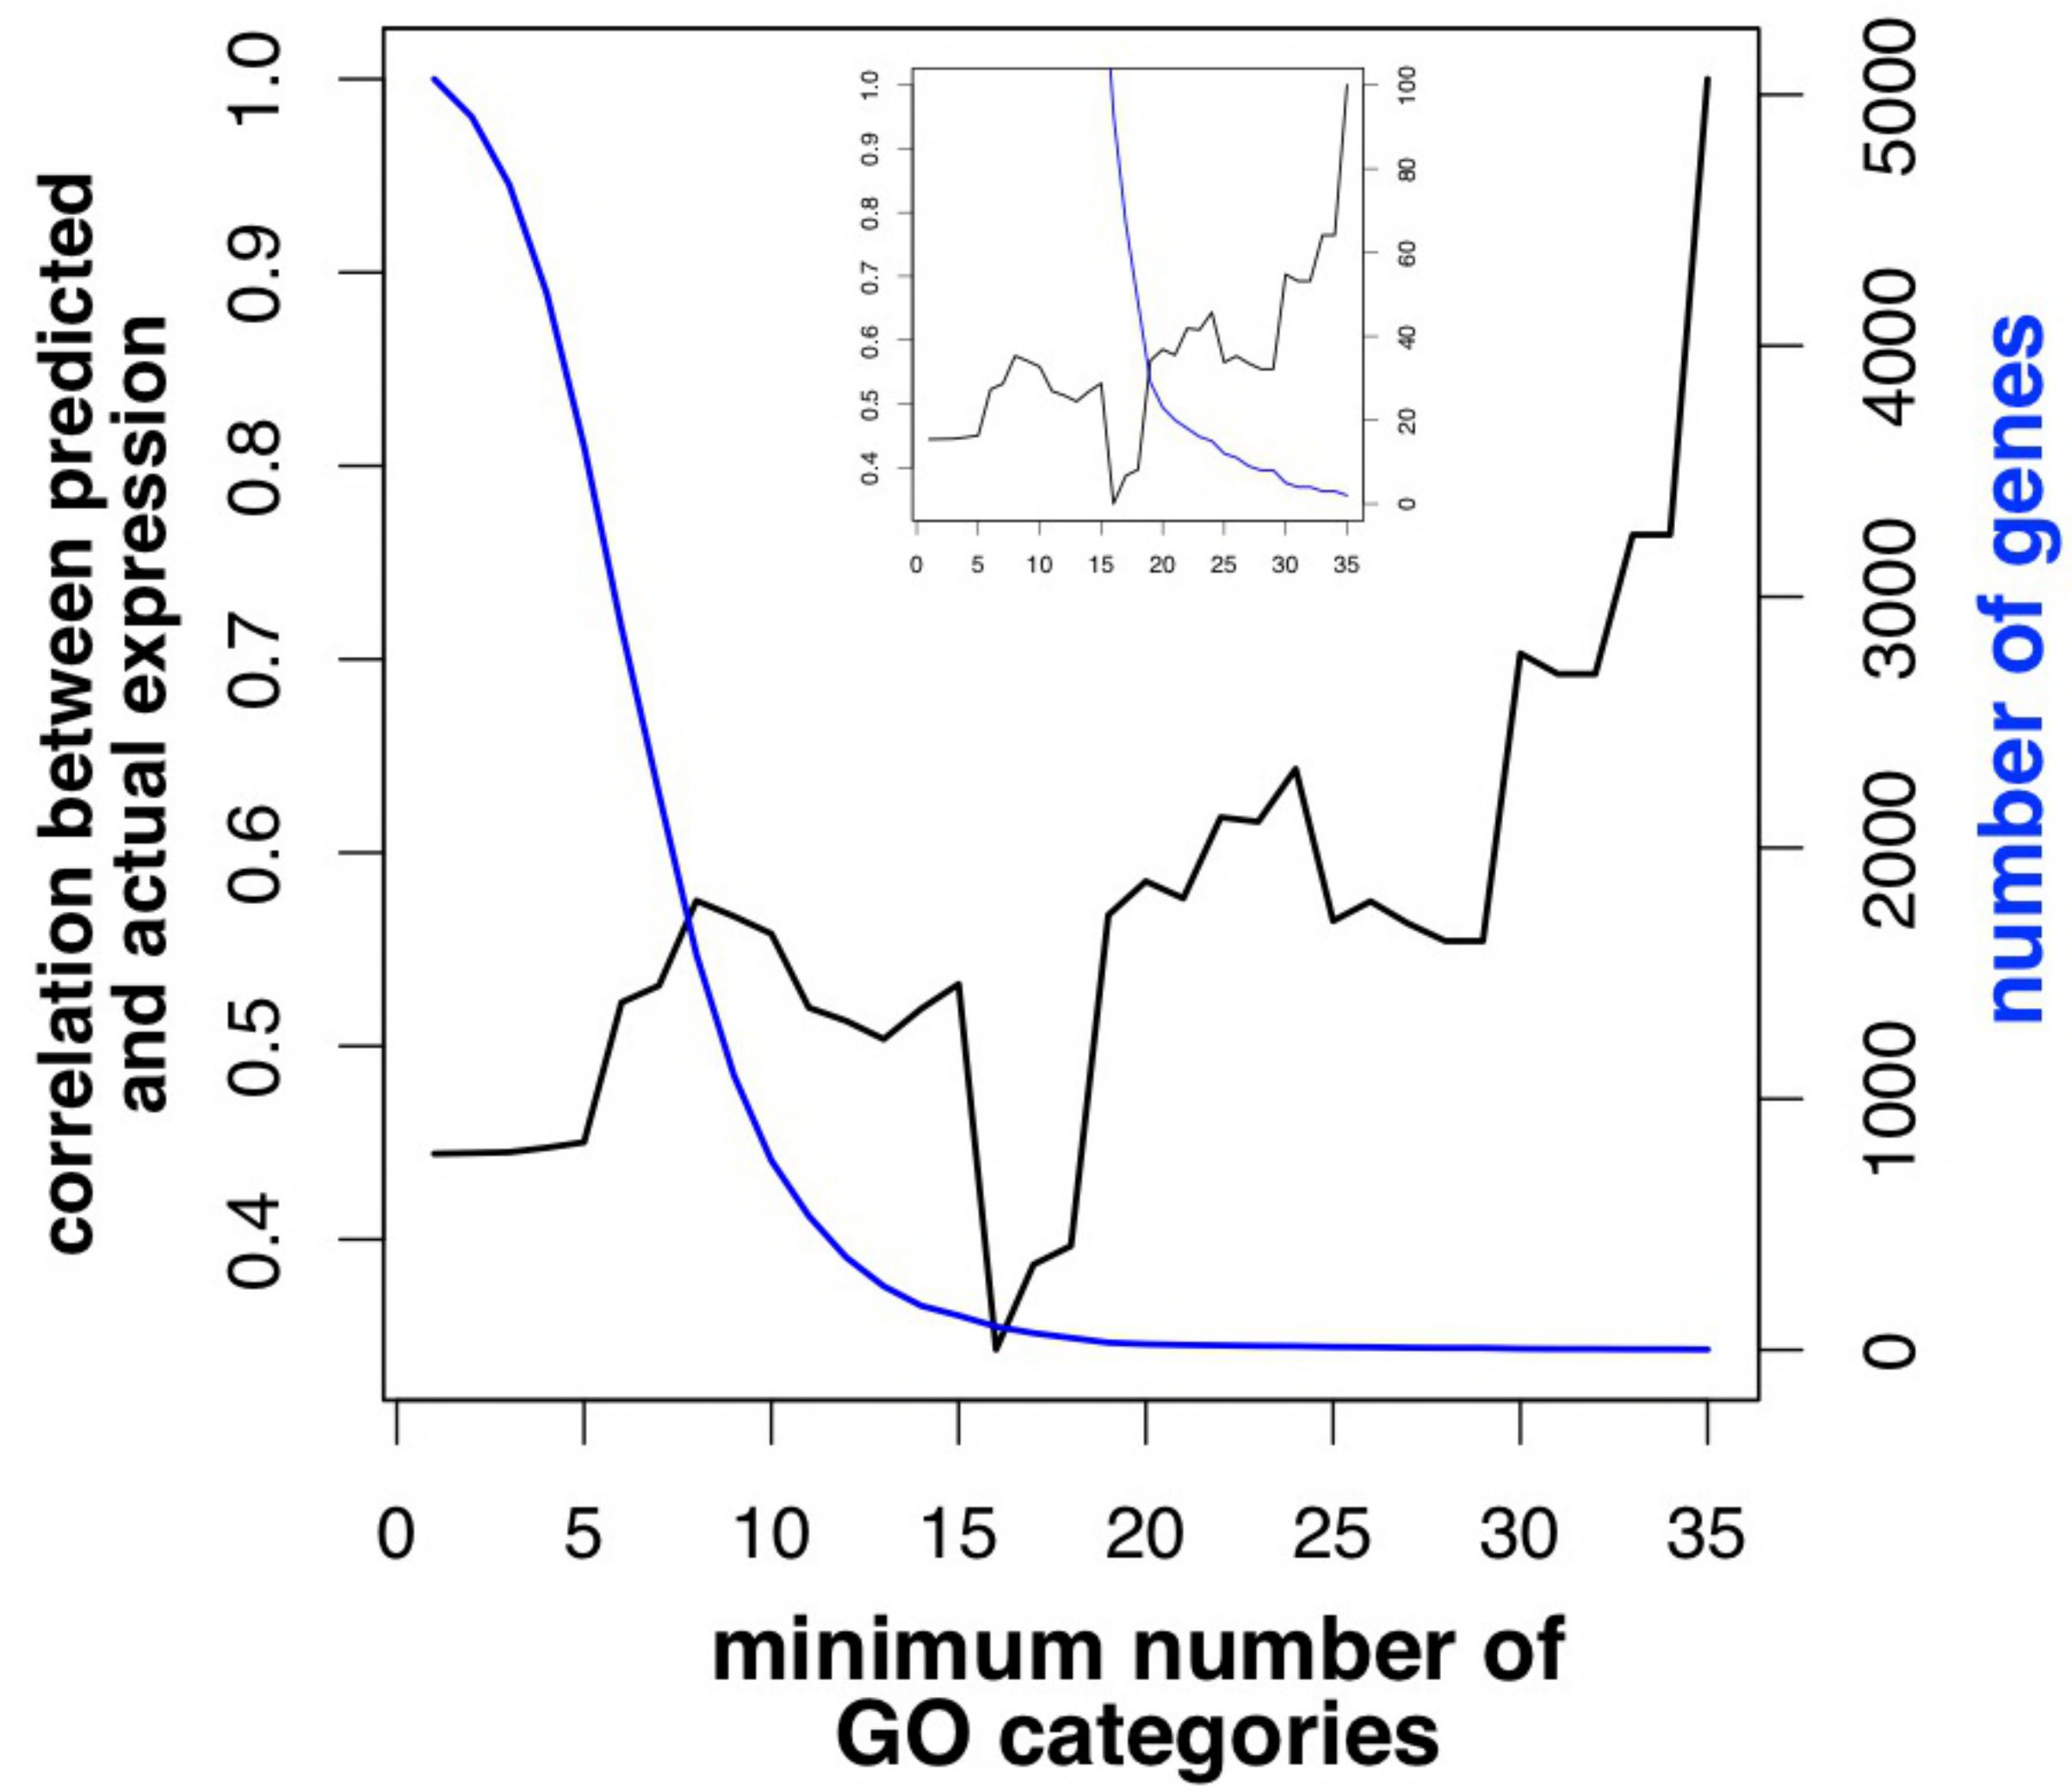

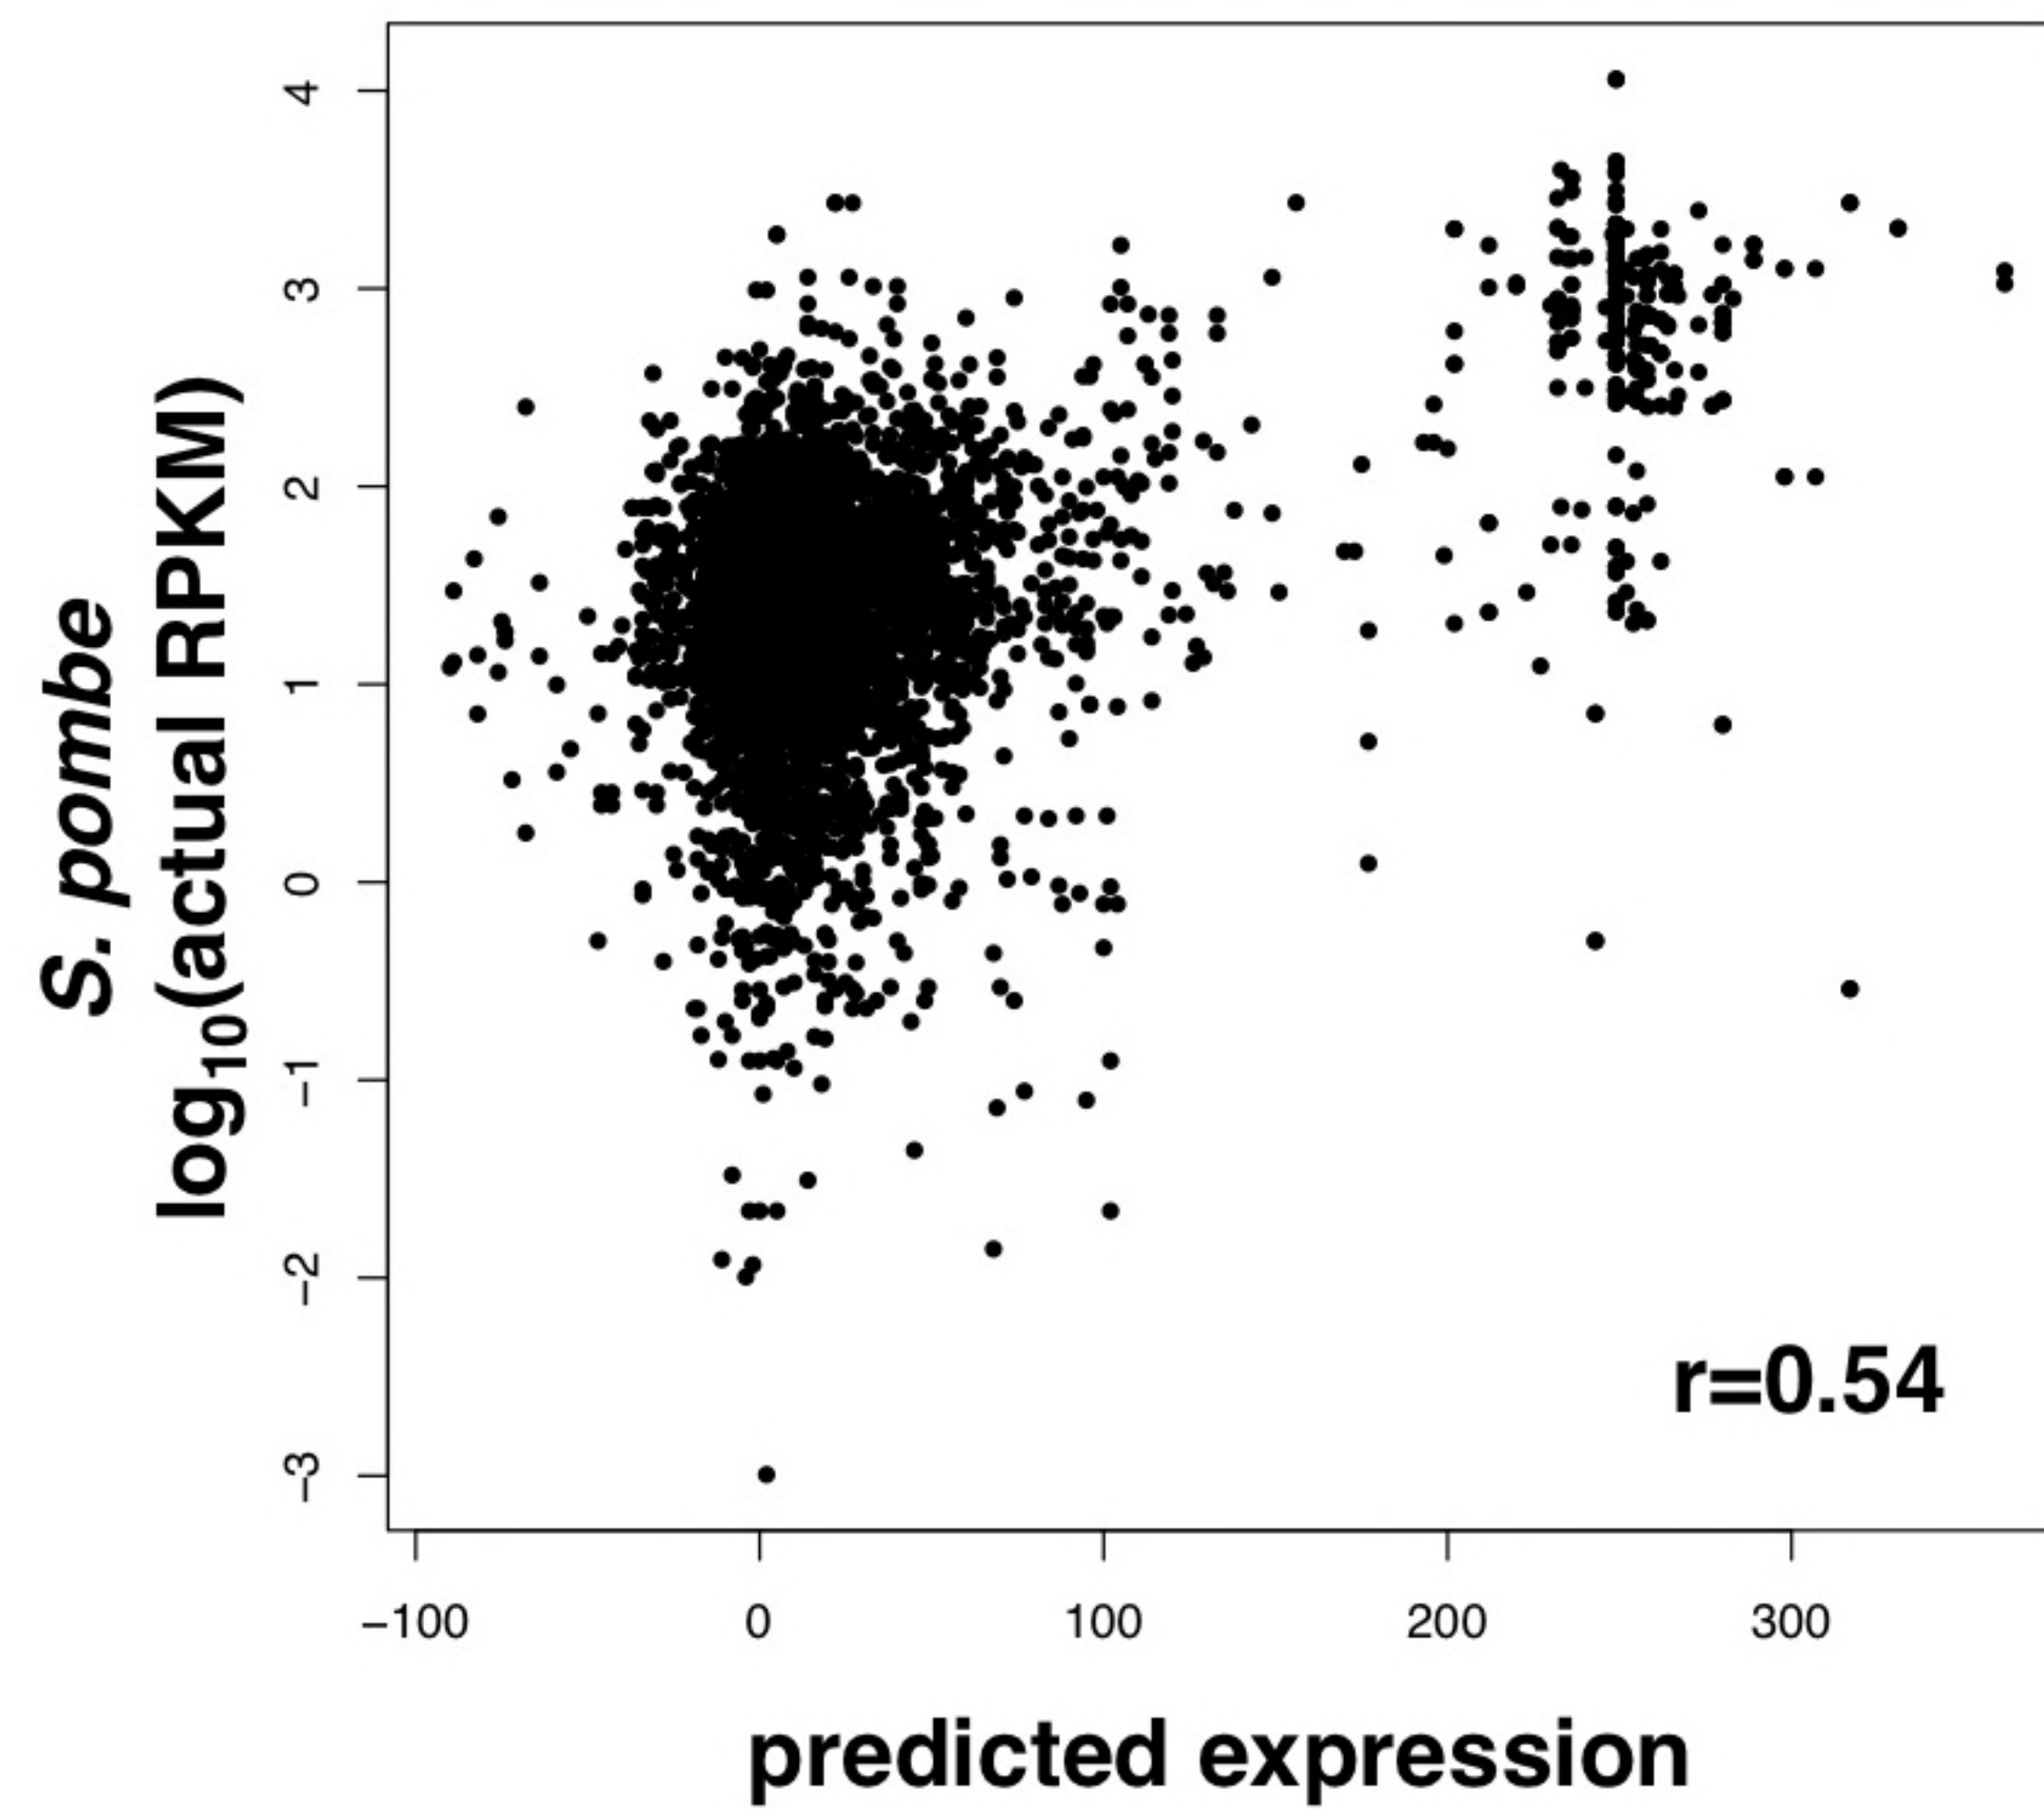

Source: http://biorxiv.org/content/10.1101/330365v1.full.pdf
